# Supplementary material for: Viral Proteins Acquired from a Host Converge to Simplified Domain Architectures
Source: PLoS Comput Biol. 2012 Feb 2;8(2):e1002364. doi: 10.1371/journal.pcbi.1002364 (PMC3271019; doi:10.1371/journal.pcbi.1002364)
Supplement: Table S1 — Baltimore Classification for the major viral families infecting vertebrate. (XLSX) [file pcbi.1002364.s005.xlsx]

## Sheet: CLASS-FAMILY
Supplementary data TABLE S1
Baltimore Classification. Major viral families infecting vertebrate (data retrived from ViralZone)
Class I	Class II	Class III	Class IV	Class V	Class VI	Class VII
Herpesviridae	Anelloviridae	Birnaviridae	Hepeviridae	Bornaviridae	Retroviridae	Hepadnaviridae
Alloherpesviridae	Circoviridae	Picobirnaviridae	Arteriviridae	Rhabdoviridae
Adenoviridae	Parvoviridae	Reoviridae	Coronaviridae	Filoviridae
Papillomaviridae			Picornaviridae	Filoviridae
Polyomaviridae			Astroviridae	Paramyxoviridae
Asfarviridae			Caliciviridae	Arenaviridae
Iridoviridae			Flaviviridae	Bunyaviridae
Poxviridae			Nodaviridae	Orthomyxoviridae
			Togaviridae
(Phycodnaviridae)
Major viral families infecting vertebrate (Abbreviated)
Class I	Class II	Class III	Class IV	Class V	Class VI	Class VII
Her	Ane	Bir	Hep	Bor	Ret	Hep
All	Cir	Pic	Art	Rha
Ade	Par	Reo	Cor	Fil
Pap			Pic	Par
Pol			Ast	Are
Asf			Cal	Bun
Iri			Fla	Ort
Pox			Nod
			Tog
(Phy)
