# Supplementary material for: Viral Proteins Acquired from a Host Converge to Simplified Domain Architectures
Source: PLoS Comput Biol. 2012 Feb 2;8(2):e1002364. doi: 10.1371/journal.pcbi.1002364 (PMC3271019; doi:10.1371/journal.pcbi.1002364)
Supplement: Table S2 — Collection and properties of the UniRef90 clusters for virus-eukaryote cross-taxa. (XLSX) [file pcbi.1002364.s006.xlsx]

## Sheet: uniref-uniprot_(taxonomy_viruse
Supplementary Table S2
187 UniRef90 clusters Cross-Taxa Viral and Cellular Organisms
Accession	Cluster name	Length	Size	Organisms	Members
UniRef90_P31748	Cluster: AKT kinase-transforming protein	501	13	AKT8 murine leukemia virus; Mus musculus (Mouse); Xenopus laevis (African clawed frog); Canis familiaris (Dog) (Canis lupus familiaris); Homo sapiens (Human); Gallus gallus (Chicken); Macaca mulatta (Rhesus macaque); Monodelphis domestica (Short-tailed gray opossum); Xenopus tropicalis (Western clawed frog) (Silurana tropicalis); Taeniopygia guttata (Zebra finch) (Poephila guttata)	P31748; Q6GSA6; UPI0001553571; Q98TY9; UPI00005A19B0; B3KVH4; O57513; UPI0000D9BDC8; UPI0000F2B267; UPI00006A1342; UPI00003AE032; UPI0000ECBAD9; Q8BS26
UniRef90_P00552	Cluster: Aminoglycoside 3'-phosphotransferase	264	22	Klebsiella pneumoniae; Hepatitis GB virus B (GBV-B) (GB virus B); Trypanosoma brucei brucei; Trypanosoma brucei; Salmonella dublin; Vibrio cholerae Mex1; Escherichia coli; Vibrio cholerae; Pseudomonas aeruginosa (strain PA7); Dual-tagging gene trap vector pGT1; Plasmid pRL765; Plasmid pRL1063a; Human immunodeficiency virus 1; Clostridium nexile DSM 1787; Rhodopseudomonas palustris (strain TIE-1);…	P00552; Q8JKE5; B3GVE8; Q76NN5; A8R6Z9; C9E5H6; Q08JA8; Q71T30; A6V7P0; Q76MW8; Q79C30; Q79C33; Q76US6; B6FNW9; B3Q767; Q15EW5; Q15EW6; Q15EW7; Q15EW8; Q15EW9; Q15EX0; Q15EX1
UniRef90_Q86VZ9	Cluster: AngRem52	340	2	Homo sapiens (Human); Beilong virus	Q86VZ9; Q287X6
UniRef90_Q02582	Cluster: Antitermination protein	207	44	Enterobacteria phage HK022 (Bacteriophage HK022); Enterobacteria phage P22 (Bacteriophage P22); Bacteriophage PS34; Enterobacteria phage lambda (Bacteriophage lambda); Escherichia coli (strain K12 / MC4100 / BW2952); Escherichia coli (strain B / BL21-DE3); Enterobacteria phage DE3; Escherichia coli (strain B / BL21); Mus musculus (Mouse); Enterobacteria phage HK620 (Bacteriophage HK620); Enteroba…	Q02582; Q77WA2; P57020; O80286; P03047; C5A0Z5; A8CGF2; C6EJG3; C6ZCW8; C5W1N3; Q3TZY6; Q9AZ08; Q9MCN6; B5Z258; B2NRR1; B2P9N8; B2PF22; B3A6N5; B3ANB6; B3B3U3; B3BN33; B3ID51; B6ZWI0; C6URH5; Q8X995; B3BZA6; A7ZWN7; B3H976; Q0T7S3; C1HNI4; C8TV17; B5BDL5; Q5PG08; A3EYX0; A3EYX1; B7LUA4; B7UNA4; C8TUJ7; C8UDH8; UPI0001AF4779; UPI0001CF6FBE; B4T7T2; B9UDI8; C6ZR62
UniRef90_Q7YQE1	Cluster: Beta-1,3-galactosyl-O-glycosyl-glycoprotein beta-1,6-N-acetylglucosaminyltransferase 3	440	14	Bos taurus (Bovine); Bovine herpesvirus 4 (strain DN-599) (BoHV-4) (Movar virus); Bovine herpesvirus 4 (strain LVR140) (BoHV-4) (Movar virus); Bovine herpesvirus 4 (strain V. test) (BoHV-4) (Movar virus); Bos mutus grunniens (Wild yak) (Bos grunniens); Bubalus bubalis (Domestic water buffalo); Ovis aries (Sheep); Syncerus caffer (Cape buffalo); Bovine herpesvirus 4 (BoHV-4) (Movar virus); Giraffa…	Q7YQE1; Q99CW3; Q805R1; Q9IZK2; Q866Z5; Q1M0V6; Q866Z6; Q866Z4; Q80RC7; Q866Z7; Q866Z8; Q80RC9; Q80RD0; Q80RC8
UniRef90_P05804	Cluster: Beta-glucuronidase	603	56	Escherichia coli (strain K12); Vaccinia virus GLV-1h68; Escherichia coli E110019; Escherichia coli O139:H28 (strain E24377A / ETEC); Escherichia coli (strain K12 / DH10B); Escherichia coli (strain SE11); Escherichia coli (strain K12 / MC4100 / BW2952); Escherichia coli (strain ATCC 33849 / DSM 4235 / NCIB 12045 / K12 / DH1); Shigella sonnei (strain Ss046); Escherichia coli O157:H7 EDL933; Arabido…	P05804; B9U1V4; B3INH9; A7ZM77; B1XF82; B6IB51; C4ZY79; C9QUW8; Q3Z1X0; UPI0000165A1A; Q93VY4; A9DEX9; A9DEY7; A9DEZ1; A9DEZ6; A9DF00; A9DF05; B2N122; B7L5G9; B3HAC5; B3WGX2; C8U8T8; Q0THL1; B3HW12; B3I8P2; C6EDN0; B3XAG3; C5W4J1; C6UIF7; C1HKX7; A1ABG2; C2DQQ6; D5D384; B7M9X0; Q1RBI1; Q8FHA3; D3QTX3; Q9AHJ4; A8A0F9; B1IQD7; B1LER9; B2U2B4; B7M0H3; B7MV93; B7NB70; B7NU18; B7URV6; C8TS92; C8UQA9; …
UniRef90_P62593	Cluster: Beta-lactamase TEM	286	417	Escherichia coli; Salmonella typhi; Klebsiella oxytoca; Acinetobacter sp. AC35; Acinetobacter sp. AC18; Acinetobacter sp. AC28; Acinetobacter sp. AC17; Acinetobacter sp. AC78; Acinetobacter sp. AC25; Acinetobacter sp. AC149; Acinetobacter sp. AC23; Proteus sp. PR425; Citrobacter sp. CI925; Citrobacter sp. CI920; Citrobacter sp. CI888; Citrobacter sp. CI174; Citrobacter sp. CI157; Enterobacter sp.…	P62593; P62594; A2T978; A2T998; A2T999; A2T9A0; A2T9A1; A2T9A2; A2T9A3; A2T9A4; A2T9A5; A2T9A6; A2T9A7; A2T9A8; A2T9A9; A2T9B0; A2T9B1; A2T9B2; A2T9B3; A2T9B4; A2T9B5; A2T9B6; A2T9B7; A2T9B8; A2T9B9; A2T9C0; A2T9C1; A2T9C2; A2T9C3; A2T9C4; A2T9C5; A2T9C6; A2T9C7; A4NTA7; A8R6N7; A8R706; B0B7B4; B1A9Z4; B1A9Z5; B2G2N1; B5B795; B5SZN3; B6DT27; C3W8J9; C4F117; C5H4R0; C8C0F2; C8C0F7; C8C0G8; C8C0H0;…
UniRef90_A0RZI7	Cluster: Capsid protein	319	3	Cryptosporidium hominis; Cryptosporidium dsRNA virus; Cryptosporidium parvum virus 1	A0RZI7; A8IXC4; O15926
UniRef90_P03326	Cluster: Capsid protein p27	309	24	Fujinami sarcoma virus; Gallus gallus (Chicken); Avian endogenous virus EV-1; Gallus varius (Green junglefowl)	P03326; Q6JAX4; Q6JAW8; Q6JAW9; Q6JAX3; Q6JAX7; Q6JAX8; Q6JAX9; Q6JAY1; Q6JAY4; Q6JAY5; Q6JAY6; Q6JAY3; P06936; Q9I9U4; Q9I9U6; Q9I9U7; Q9I9U8; Q9I9U9; Q9I9V0; Q9I9V1; Q9I9V3; Q9I9V5; Q9I9V7
UniRef90_Q90ZJ9	Cluster: C-myc oncogene, aa 44-62 from c-myc/LL3 (ALV provirus). (Fragment)	24	3	Gallus gallus (Chicken); Avian leukosis virus (ALV); Xenopus laevis (African clawed frog)	Q90ZJ9; Q85618; Q546B4
UniRef90_P69687	Cluster: Coat protein	159	50	Tobacco mosaic virus (strain vulgare) (TMV) (Tobacco mosaic virus (strain U1)); Tobacco mosaic virus (strain B935A) (TMV); Tobacco mosaic virus (strain Korean NC 82) (TMV); Tobacco mosaic virus; Tobacco mosaic virus (strain 06) (TMV-06); Tobacco mosaic virus (strain ER) (TMV); Tobacco mosaic virus (strain Kokubu) (TMV); Tobacco mosaic virus (strain O) (TMV); Tobacco mosaic virus (strain OM) (TMV)…	P69687; P69688; P69689; Q77LT8; P03574; P03573; P69508; P69507; Q77H57; P03571; Q98747; A0PFU6; A3FG32; A3RF56; A7M754; A8UXA2; B7S4X0; D0U5A5; D0U5A6; C6KMQ4; D0U5A7; D0U5A8; Q1XF41; Q80P10; Q27HQ6; Q4U3X0; Q6IT06; Q6Q764; Q716Y2; Q7T699; Q80P12; Q80P13; Q80P14; Q8JQ53; Q8JQ54; Q8JQ55; Q8JQ56; Q98WI7; Q99D28; Q99D29; Q99D30; Q99D31; Q5RLM9; Q9IBM1; Q88881; Q9WPZ8; B3VQW0; Q5G7A5; Q88601; P93362
UniRef90_P03324	Cluster: Core protein p19	150	13	UR2 sarcoma virus (UR2SV) (Avian sarcoma virus (strain UR2)); Rous sarcoma virus; Avian myelocytomatosis virus; Fujinami sarcoma virus; Avian rous-associated virus type 1; Gallus gallus (Chicken); Rous-associated virus type 2	P03324; Q64985; UPI000023364E; Q85480; UPI0000174A22; UPI0000233652; Q86713; Q85479; Q86327; Q86328; Q9W7I8; Q85714; Q85707
UniRef90_P03323	Cluster: Core protein p27	453	3	Avian myelocytomatosis virus MC29; Avian myelocytomatosis virus HBI; Gallus gallus (Chicken)	P03323; P06444; Q6JAX5
UniRef90_B9X1Q6	Cluster: D1 protein (Fragment)	265	6	Phormidium sp. BGA-6; Uncultured marine organism; Uncultured marine virus; Uncultured Trebouxia photobiont; Trebouxia jamesii; Trebouxia erici	B9X1Q6; A6YDX3; B4Z001; A5HIL5; A5HIL7; A5HIL6
UniRef90_D0E0F5	Cluster: D1/32 kD photosystem II reaction center protein (Fragment)	198	12	Nannochloris atomus (Green alga); Frullania inflata; Lejeunea eckloniana; Radula complanata; Lepidolaena clavigera; Frullania spathulistipa; Kochia scoparia (Summer cypress); Chlamydomonas sp. CCMP1619; Raphanus raphanistrum (Wild radish); Uncultured cyanophage; Uncultured cyanobacterium	D0E0F5; C4N6N5; A4GHA4; A4H1J4; A4H1K1; C4N6G7; Q85X79; Q6EI11; Q85X80; A5YV74; B5L321; B0JEU8
UniRef90_Q9SSZ0	Cluster: DA-3	487	2	Trifolium repens (Creeping white clover); White clover cryptic virus 1 (WCCV-1)	Q9SSZ0; Q64FN9
UniRef90_Q9IEZ9	Cluster: E1A nucleoprotein (Fragment)	12	17	Homo sapiens (Human); Human adenovirus C	Q9IEZ9; B1P137; B1P124; B1P125; B1P126; B1P127; B1P133; B1P134; B1P135; B1P138; B1P139; B1P128; B1P129; B1P130; B1P131; B1P132; B1P136
UniRef90_Q8K170	Cluster: EG622147 protein (Fragment)	325	12	Mus musculus (Mouse); Mouse endogenous murine leukemia virus	Q8K170; O91629; O91630; Q77Z11; Q9YJC4; Q9YYT1; Q9YYT2; Q9YYT4; Q9YYS7; Q9YYS8; Q9YYS9; Q9YYT0
UniRef90_Q61536	Cluster: Endogenous mammary tumor virus (MMTV) RNA, env gene and right LTR. (Fragment)	362	6	Mus musculus (Mouse); Human betaretrovirus; Mouse mammary tumor virus (MMTV)	Q61536; Q6JQM9; Q7SPV5; Q4KWC9; Q4KWD0; Q4KWD1
UniRef90_Q61883	Cluster: Endogenous mammary tumor virus MTV-9 mRNA envelope gene. (Fragment)	75	2	Mus musculus (Mouse); Mouse mammary tumor virus (MMTV)	Q61883; Q8AFG1
UniRef90_Q61533	Cluster: Endogenous murine leukemia virus (Fragment)	202	6	Mus musculus (Mouse); Mink cell focus-forming virus; Murine leukemia virus	Q61533; Q83184; Q7SLW4; Q61875; A8CT00; Q85626
UniRef90_O73908	Cluster: Endogenous retroviral envelope protein (Fragment)	444	10	Gallus gallus (Chicken); Avian leukosis virus (ALV); Avian endogenous retrovirus EAV-HP	O73908; Q9IGS5; Q9IGS9; Q5D5K8; Q9IGS3; Q9DY00; Q9QME5; Q9QME6; Q9QME7; Q9QME8
UniRef90_Q62367	Cluster: Endogenous superantigen	322	4	Mus musculus (Mouse); Mouse mammary tumor virus (MMTV)	Q62367; Q83403; Q83412; Q9W7W5
UniRef90_P10400	Cluster: Endonuclease (Fragment)	120	41	Mus musculus (Mouse); Murine leukemia virus; Mink cell focus-forming virus; Rauscher spleen focus-forming virus (RSFFV); Xenotropic murine leukemia virus	P10400; Q80SU2; Q5MNK1; Q5MNK7; Q5MNK9; Q5MNL3; Q5MNL7; Q5MNM5; Q5MNM9; Q5MNP5; Q5MNP7; Q85505; Q5MNL5; Q5MNL9; Q5MNM7; Q5MNN1; Q85627; Q61523; Q85702; Q80ST8; Q5MNK3; Q5MNK5; Q5MNL1; Q5MNM1; Q5MNN3; Q5MNN5; Q5MNN7; Q5MNN9; P03358; Q83376; Q85509; Q86109; Q61870; Q80SU1; Q80ST3; Q80ST7; Q811N0; Q5MNP1; Q5MNP3; Q7ZSX1; Q5MNM3
UniRef90_P00726	Cluster: Endopeptidase	153	34	Enterobacteria phage lambda (Bacteriophage lambda); Paracoccidioides brasiliensis; Enterobacteria phage DE3; Escherichia coli (strain K12 / MC4100 / BW2952); Escherichia coli (strain B / BL21); Escherichia coli (strain B / BL21-DE3); Escherichia coli (strain SE11); Escherichia coli (strain K12); Escherichia coli (strain K12 / DH10B); Escherichia coli (strain ATCC 33849 / DSM 4235 / NCIB 12045 / K…	P00726; Q71MJ2; C6ZCX2; C5A0Z8; C5W1U6; C6EJF9; B6IA93; C6EFM3; C5W3H1; P75719; B1XGF2; C4ZV01; C9R1G7; B3BQ99; UPI0001BCF2C6; B3HCA5; Q0TIQ7; B3HV10; B3I4J5; B3WMH0; C6EKD5; B3XDB7; C5W0R0; C6UCE6; D5CWA6; C8TJE9; C8U2P0; P77551; C6VCH2; B1XCJ2; C5W3H2; C6UH08; C6URV3; Q8X704
UniRef90_O70312	Cluster: Env	313	2	Mus musculus (Mouse); Human betaretrovirus	O70312; Q7SPV6
UniRef90_Q62366	Cluster: Env	301	2	Mus musculus (Mouse); Mouse mammary tumor virus (MMTV)	Q62366; Q38J51
UniRef90_P01126	Cluster: Env polyprotein C-terminal	503	2	Avian reticuloendotheliosis virus; Gallus gallus (Chicken)	P01126; UPI0000ECC67C
UniRef90_O62705	Cluster: Env protein	638	12	Sus scrofa (Pig); Porcine endogenous retrovirus C; Sus barbatus (Bearded pig); Porcine endogenous retrovirus	O62705; Q90LX3; Q5J1S8; Q8Q6Y9; O62707; Q08GP6; Q08GP9; Q5J1S9; B1AC38; Q90LX4; Q90LX5; A8HK56
UniRef90_A8NC06	Cluster: Envelope glycoprotein	636	2	Sus scrofa (Pig); Porcine endogenous retrovirus C	A8NC06; Q90LX2
UniRef90_D3GGN7	Cluster: Envelope glycoprotein	617	19	Ovine enzootic nasal tumour virus; Ovis aries (Sheep)	D3GGN7; D3GGP1; D3GGP5; D3GGP9; Q8QFI9; Q9WJ21; A9LHJ2; A9LHJ7; A9LHK2; A9LHK7; A9LHL6; A9LHL9; A9LHM2; A9LHP3; A9LHP9; A9LHQ1; A9LHQ2; Q09PL0; Q9TTD3
UniRef90_Q86UH7	Cluster: Envelope glycoprotein	682	2	Homo sapiens (Human); Human endogenous retrovirus HCML-ARV	Q86UH7; Q7ZGS2
UniRef90_Q5MNJ6	Cluster: Envelope glycoprotein (Fragment)	215	6	Mus musculus (Mouse); Mink cell focus-forming virus; Murine leukemia virus	Q5MNJ6; Q811N5; Q61524; Q85703; Q61871; Q8J9D5
UniRef90_Q6YLJ2	Cluster: Envelope glycoprotein (Fragment)	213	11	Sus scrofa (Pig); Porcine endogenous retrovirus M20; Porcine endogenous retrovirus; Porcine endogenous retrovirus A	Q6YLJ2; Q90DY2; Q0GN97; Q5XLL8; Q5XLL9; Q5XLM0; Q152R7; Q5XLM1; Q5XLM2; B1PRL7; Q09N06
UniRef90_Q6YLJ3	Cluster: Envelope glycoprotein (Fragment)	218	3	Sus scrofa (Pig); Porcine endogenous retrovirus	Q6YLJ3; Q9IUF1; Q9IUF5
UniRef90_Q6YLJ4	Cluster: Envelope glycoprotein (Fragment)	213	5	Sus scrofa (Pig); Porcine endogenous retrovirus	Q6YLJ4; Q6YLJ1; Q6YLJ8; Q90UK3; Q90UK6
UniRef90_Q6YLJ6	Cluster: Envelope glycoprotein (Fragment)	294	6	Sus scrofa (Pig); Porcine endogenous retrovirus FPP-1	Q6YLJ6; Q6YLJ9; Q90DY4; Q6YLJ5; Q6YLJ7; Q6YLK0
UniRef90_Q8HX88	Cluster: Envelope glycoprotein (Fragment)	173	471	Pan troglodytes verus; Simian T-lymphotropic virus 1; Human T-lymphotropic virus 1; Simian T-lymphotropic virus 3	Q8HX88; Q6BEK9; A3DT34; Q7SM48; A5I8N4; B6RTE4; B6RTE5; B6RTE6; B6RTE8; O12909; O12911; O73457; O89738; O89739; O89740; Q6RJJ2; Q6RJJ6; Q6RJK1; Q6WZB6; Q82174; Q82180; Q82181; Q82182; Q82211; Q82213; Q82328; Q82329; Q82331; Q82332; Q82333; Q82350; Q82352; Q82354; Q82355; Q82362; Q82387; Q8AEW3; Q8Q7C3; Q8Q7C4; Q902X0; Q902X1; Q902X2; A3DSZ0; A3DT24; A3DT12; A3DT18; A3DT21; A3DT32; A3DSZ3; Q7SM45;…
UniRef90_Q6W4U2	Cluster: Envelope protein	657	41	Sus scrofa (Pig); Porcine endogenous retrovirus; Porcine endogenous retrovirus B; Porcine endogenous retrovirus C	Q6W4U2; Q6W4U3; Q6W4U4; Q6W4V0; Q8WMU1; Q8UMP4; C0IV23; O41173; O73506; Q8J4V5; Q8UM95; Q90RL5; UPI00017EF8E1; O70942; Q9IUF3; Q6W4V4; Q8WMU2; Q8WMU3; Q8WMU4; Q8WMU0; Q6W4V5; Q9IUF0; Q8WN76; Q8WN78; Q8WN79; Q8WN80; Q8WN81; Q8WN82; Q8WN89; Q6W4U1; Q6W4T9; Q4U4N7; Q4U4N8; Q4U4N9; Q4U4P0; Q4U4P1; Q4U4P2; Q4U4P3; Q4U4P4; Q4U4P5; Q4U4P6
UniRef90_Q6W4U7	Cluster: Envelope protein	660	42	Sus scrofa (Pig); Porcine endogenous retrovirus; Porcine endogenous retrovirus A; Sus celebensis (Celebes wild boar) (Sulawesi warty pig); Porcine endogenous retrovirus C/A; Porcine endogenous retrovirus C	Q6W4U7; Q9IUF6; Q9IUF7; Q6W4V3; A2TGW5; A7UMV4; O41172; Q8J4V7; Q8JEM7; Q5J1S7; Q4VFZ1; Q6UQ77; Q6UQ78; Q6UQ79; Q8Q6Y6; Q8Q6Y7; Q8Q6Y8; Q9Q9X3; Q5I6D0; Q6W4U6; Q6W4V1; Q6WGH9; A1YTJ3; A7UMV0; A7UMV2; A7UMV3; A7UMV5; Q8UM98; Q90RL8; Q6W4V2; Q6W4U5; Q8Q6U6; Q6W4U9; Q8WN77; Q8WN83; Q8WN84; Q8WN86; Q8WN87; Q8WN88; Q4U4R3; B3VQ66; Q4U4Q6
UniRef90_Q6W4U8	Cluster: Envelope protein	612	6	Sus scrofa (Pig); Porcine endogenous retrovirus C/A; Porcine endogenous retrovirus; Porcine endogenous retrovirus A	Q6W4U8; Q5QGQ7; Q8Q6Z0; Q8Q6Z1; A7UMV1; Q4U4R5
UniRef90_Q7ZZV5	Cluster: Envelope protein	569	42	Gallus gallus (Chicken); Avian leukosis virus (ALV); Avian leukosis virus HPRS103; Avian endogenous retrovirus EAV-HP	Q7ZZV5; Q9IGS4; Q64997; Q6A2B2; Q6A2B5; Q7ZLA0; A1YLR1; Q5D5K1; Q5D5K2; Q5D5L5; Q5D5K5; Q5D5K6; Q5D5K7; A1YLR2; Q5D5K3; Q5D5K4; Q5D5L0; Q5D5K9; Q5D5L3; Q5D5L1; Q7ZL99; Q5D5L2; D2KKF1; D2KKF2; D2KKF3; D2KKF7; D2KKF9; D2KKG3; D2KKG4; D2KKG5; D2KKF4; D2KKF5; D2KKF6; D2KKF8; D2KKG0; D2KKG1; D2KKG2; D2KKG6; D2KKG7; D2KKG8; D2KKG9; Q9IGT0
UniRef90_Q0GN96	Cluster: Envelope protein (Fragment)	88	6	Sus scrofa (Pig); Porcine endogenous retrovirus; Porcine endogenous retrovirus B	Q0GN96; Q3BD91; Q3BD89; Q3BD90; Q152R6; B1PMB2
UniRef90_Q4JM62	Cluster: Envelope protein (Fragment)	369	247	Homo sapiens (Human); Human endogenous retrovirus K	Q4JM62; Q4JM57; Q4JM60; B1P6M1; B1P6M3; B1P6N7; B1P6P6; B1P6T0; B1P6T9; B1P6Z3; B1P706; B1P743; Q27VB7; Q27VE2; Q27VE3; Q27VE4; Q27VE5; Q4JM63; Q4JM64; B1P6K9; B1P6L1; B1P6R9; B1P6S1; B1P6W7; B1P6W8; B1P6X3; B1P6L0; B1P6M2; B1P6Q0; B1P6Q5; B1P6R5; B1P6S0; B1P6S6; B1P6U3; B1P6U8; B1P6V9; Q27VF3; B1P6L2; B1P6L7; B1P6S2; B1P6X0; B1P6X1; B1P6L3; B1P6L4; B1P6S3; B1P6L5; B1P6L6; B1P6N1; B1P6Z7; B1P6Z8;…
UniRef90_Q61872	Cluster: Envelope protein (Fragment)	85	4	Mus musculus (Mouse); Murine leukemia virus	Q61872; Q7SLW5; Q7SLW6; Q83374
UniRef90_Q78ED3	Cluster: Envelope protein (Fragment)	30	3	Mus musculus (Mouse); Mouse mammary tumor virus (MMTV)	Q78ED3; UPI0000233635; P88999
UniRef90_Q9NP17	Cluster: Env-like protein (Fragment)	214	43	Homo sapiens (Human); Mouse mammary tumor virus (MMTV); Human mammary tumor virus	Q9NP17; Q2HXY4; D0VPX6; Q1G6A8; Q1G6B1; Q6PKT5; Q2HXY5; D0VPX7; D0VPX8; D0VPX9; D0VPY3; D0VPY4; D0VPY5; D0VPY6; D0VPY8; D0VPZ2; D0VPZ4; D0VPZ5; D0VPZ6; D0VPZ7; D0VPZ8; D0VQ06; D0VQ09; D0VQ12; D0VQ13; D0VQ14; Q6RJW6; Q6PKT6; Q6PKT8; D0VPY0; D0VPY2; D0VPY7; D0VPY9; D0VPZ0; D0VPZ1; D0VPZ3; Q6RJW4; Q1G6A9; Q1G6B0; Q6RJW2; D3G8F5; D0VQ07; D0VQ08
UniRef90_Q5ZP36	Cluster: EP1 protein	298	3	Cotesia congregata bracovirus; Cotesia congregata (Parasitoid wasp)	Q5ZP36; Q9YID2; Q84175
UniRef90_Q16604	Cluster: ERV8 protein (Fragment)	33	3	Homo sapiens (Human); Human endogenous retrovirus K	Q16604; O71072; Q9YPB3
UniRef90_Q9QME4	Cluster: Gag polyprotein	1125	2	Avian endogenous retrovirus EAV-HP; Gallus gallus (Chicken)	Q9QME4; UPI0000E7FB5A
UniRef90_A8NBY5	Cluster: Gag protein	524	22	Sus scrofa (Pig); Sus scrofa domestica (domestic pig); Porcine endogenous retrovirus; Porcine endogenous retrovirus C; Porcine endogenous retrovirus C/A	A8NBY5; Q9N1T7; Q6T3V5; O62704; O62706; O62708; A1YTJ1; C0IV21; O73504; Q4VFZ3; Q5QGQ9; Q6T3V4; Q6UJZ2; Q6UJZ3; Q6UJZ5; Q7ZBT7; Q8Q6U8; Q8UM97; Q8UMA0; Q8UMP6; Q90RL7; Q90RM0
UniRef90_Q61540	Cluster: Gag protein	243	3	Mus musculus (Mouse); Mus musculus mobilized endogenous polytropic provirus	Q61540; Q6PEQ1; B9VGS5
UniRef90_Q61541	Cluster: Gag protein	225	2	Mus musculus (Mouse); Mus musculus mobilized endogenous polytropic provirus	Q61541; B9VGS8
UniRef90_Q86UH9	Cluster: Gag protein	523	2	Homo sapiens (Human); Human endogenous retrovirus HCML-ARV	Q86UH9; Q7ZGS4
UniRef90_Q9PWB8	Cluster: Gag/env fusion protein (Fragment)	692	4	Gallus gallus (Chicken); Avian endogenous retrovirus EAV-HP	Q9PWB8; UPI0000E7FE6F; UPI0000E81B3A; Q6A2B4
UniRef90_Q61917	Cluster: Genomic murine leukemia virus (MuLV) related sequence (LTR-gag) (Fragment)	21	8	Mus musculus (Mouse); MLV-like endogenous virus; Mus musculus mobilized endogenous polytropic provirus; Xenotropic MuLV-related virus	Q61917; O56583; B9VGS6; C4P9M8; C4P9M7; D0EFL9; D0EFM0; D0EFM1
UniRef90_P03393	Cluster: Glycoprotein 55	409	6	Friend spleen focus-forming virus (isolate 502) (FSFFV); Friend spleen focus-forming virus (FSFFV); Friend spleen focus-forming virus (strain Lilly-Steeves) (FSFFV); Mus musculus (Mouse); Rauscher spleen focus-forming virus (RSFFV)	P03393; O92791; P03394; B8YPG2; B8YPG3; P03389
UniRef90_P01112	Cluster: GTPase HRas, N-terminally processed	189	22	Homo sapiens (Human); Mus musculus (Mouse); Gallus gallus (Chicken); Moloney murine sarcoma virus (MoMSV); Murine sarcoma virus NS.C58; Rattus norvegicus (Rat); Sorex araneus (Eurasian common shrew) (European shrew); Ailuropoda melanoleuca (Giant panda); Taeniopygia guttata (Zebra finch) (Poephila guttata); Salmo salar (Atlantic salmon); Xenopus tropicalis (Western clawed frog) (Silurana tropical…	P01112; Q76LV5; P08642; Q61411; P01113; Q9R0B8; P23175; P20171; B3RFG8; D2I2S4; B5G0X7; B5X1B6; Q28EW2; Q8UUZ4; Q4PJW4; Q4SAD9; Q503B6; Q568K0; UPI00001A024C; UPI000036EB00; UPI0001796E53; UPI0000E592DB
UniRef90_P01116	Cluster: GTPase KRas, N-terminally processed	189	16	Homo sapiens (Human); Canis familiaris (Dog) (Canis lupus familiaris); Mus musculus (Mouse); Rattus norvegicus (Rat); Kirsten murine sarcoma virus; Ailuropoda melanoleuca (Giant panda); Salmo salar (Atlantic salmon); Liza aurata (Golden grey mullet); Xenopus laevis (African clawed frog); Oryzias latipes (Medaka fish) (Japanese ricefish); Tetraodon nigroviridis (Green puffer); Rivulus marmoratus (…	P01116; UPI0000EB0BAE; P32883; P08644; Q0VDV7; P01117; D2H1A6; C0HAH5; C1JCT5; O13021; O57467; Q4S7E9; Q5EFX7-2; UPI00006A22FD; UPI000155ECA4; P05774
UniRef90_Q07983	Cluster: GTPase KRas, N-terminally processed	188	35	Monodelphis domestica (Short-tailed gray opossum); Anguilla anguilla (European freshwater eel); Cyprinus carpio (Common carp); Meleagris gallopavo (Common turkey); Oryzias latipes (Medaka fish) (Japanese ricefish); Rivulus marmoratus (Mangrove rivulus) (Kryptolebias marmoratus); Rattus norvegicus (Rat); Mus musculus (Mouse); Dicentrarchus labrax (European sea bass); Liza aurata (Golden grey mulle…	Q07983; Q1WKM1; Q9YH38; P79800; O42277; Q5EFX7; A0JN17; P08644-2; Q3U2W7; Q5J7N1; P32883-2; C1JCT3; C1JCT4; O93280; O93563; Q6AZA4; Q9PSS8; P01116-2; UPI000017642B; UPI0001796936; Q05147; Q15285; Q5U5E1; Q66JB2; C1C4U8; Q66JH1; Q91832; Q4V9A9; Q91122; Q5Q1M1; UPI00004DA410; Q91211; Q2KKU9; Q92668; Q82954
UniRef90_O15546	Cluster: HERV-E envelope glycoprotein (Fragment)	75	2	Homo sapiens (Human); Human endogenous retrovirus	O15546; Q68998
UniRef90_O15521	Cluster: HERV-E integrase (Fragment)	80	2	Homo sapiens (Human); Human endogenous retrovirus	O15521; Q68997
UniRef90_Q9Y6I0	Cluster: HERV-K_7p22.1 provirus ancestral Pro protein	156	28	Homo sapiens (Human); Human endogenous retrovirus K	Q9Y6I0; Q3LVS8; Q3LVT9; Q3LVS9; Q3LVT1; Q3LVT4; Q3LVT2; Q3LVT6; Q3LVU0; Q3LVU1; Q3LVU2; Q3LVU3; Q3LVU4; P63119; Q3LVT0; P63131; Q3LVT3; Q3LVT7; Q3LVT8; P63129; Q3LVT5; P10265; P63125; P63120; P63127; P63121; P63122; P63124
UniRef90_Q16330	Cluster: HERVK10/HUMMTV reverse transcriptase homolog protein (Fragment)	30	2	Homo sapiens (Human); Human endogenous retrovirus	Q16330; O71991
UniRef90_D5GV94	Cluster: Hypothetical phage protein	142	3	Campylobacter phage CP220; Campylobacter phage CPt10; Entamoeba histolytica	D5GV94; D5GVU1; B1N618
UniRef90_P0CF31	Cluster: Insertion element IS1 protein insB	167	194	Escherichia coli; Shigella sonnei (strain Ss046); Shigella sonnei; Acinetobacter baumannii; Escherichia coli (strain K12); Haemophilus ducreyi; Uncultured archaeon; Clostridium bolteae ATCC BAA-613; Clostridium ramosum DSM 1402; Clostridium scindens ATCC 35704; Streptococcus suis 89/1591; Escherichia coli O9:H4 (strain HS); Escherichia coli (strain K12 / DH10B); Streptococcus equi subsp. zooepide…	P0CF31; Q3Z3F0; Q93PX5; Q3Z5Z0; Q2FCY8; Q3YXD4; P0CF25; P0CF28; P0CF29; P0CF30; P59843; D1JAB2; A8S4C3; B0N5W3; B0NIL6; B9WUU9; Q7B2Q3; A8A355; B1X7Q3; B4U280; C4ZPU7; C5W422; C6EAK0; C6UCS4; Q1J7G6; Q6APY4; Q72ZH7; P0CF26; P0CF27; D4HR76; B1XE06; P57998; B1X8U2; C4ZQB5; Q32DZ5; Q6SIY8; Q71TR0; A7DY45; A7KG30; A8R6K7; B3HB78; B3WKS6; B3WWE8; B3XJU0; B3Y0M8; C3W8K4; Q573S1; Q5QJL6; A6T6H4; B1LJZ5;…
UniRef90_P12894	Cluster: Integrase	814	4	Mouse intracisternal a-particle IL3 (IAP-IL3); Mus musculus (Mouse)	P12894; Q0VGN5; Q8C2B1; Q7TQ37
UniRef90_P31623	Cluster: Integrase	870	22	Sheep pulmonary adenomatosis virus (Jaagsiekte sheep retrovirus) (JSRV); Ovine enzootic nasal tumour virus; Enzootic nasal tumour virus of goats; Ovis aries (Sheep)	P31623; Q9WR73; Q95N66; D3GGN6; D3GGP0; D3GGP4; D3GGP8; D3GGQ2; Q7SME9; UPI000051AEB7; A9LHN0; A9LHJ0; A9LHL5; A9LHN3; A9LHN5; A9LHP6; A9LHJ5; A9LHK0; A9LHK5; A9LHM5; A9LHP1; Q9N1R8
UniRef90_Q2F7J3	Cluster: Integrase p46	1733	26	Xenotropic MuLV-related virus (isolate VP35) (XMRV); Murine leukemia virus; Mus musculus (Mouse); Xenotropic MuLV-related virus (isolate VP42) (XMRV); Xenotropic MuLV-related virus (isolate VP62) (XMRV); Xenotropic MuLV-related virus; Xenotropic MuLV-related virus 22Rv1; DG-75 Murine leukemia virus; Xenotropic murine leukemia virus; Friend murine leukemia virus (isolate FB29) (FrMLV); Friend muri…	Q2F7J3; Q83362; P70355; Q1KYL9; Q1KYM2; Q1KYL6; Q7SVK7; Q9J8E2; Q2F7J0; A1Z651; D0UFA3; D0UFA6; D5H3E2; Q9E7M1; A7LM24; P26809; P26808; O41250; Q9YK99; Q60FS6; Q60FS9; P03356; P11227; Q90RL4; Q9WHV7; Q83398
UniRef90_Q4VHD0	Cluster: Interleukin 10 (Fragment)	68	8	Phocoenoides phocoena (Harbor porpoise); Ailuropoda melanoleuca (Giant panda); Mustela putorius furo (European domestic ferret) (Mustela furo); Capra hircus (Goat); Orf virus (ORFV)	Q4VHD0; D2HBN2; A3FBF2; Q8HY37; Q5YB51; Q5YB54; Q5YB61; Q5YB55
UniRef90_Q6PVS0	Cluster: Interleukin 10 (Fragment)	45	2	Ovis aries (Sheep); Orf virus (ORFV)	Q6PVS0; Q5YB56
UniRef90_P43480	Cluster: Interleukin-10	178	12	Bos taurus (Bovine); Bubalus carabanensis (Swamp type water buffalo); Bubalus bubalis x Bubalus carabanensis; Bubalus bubalis (Domestic water buffalo); Cervus elaphus (Red deer); Ovis aries (Sheep); Capra hircus (Goat); Seal parapoxvirus; Orf virus (ORFV)	P43480; Q2PE73; Q2MH14; Q2PE56; P51746; UPI000179DC3F; Q6VV71; Q29408; Q6H8Q2; A7Y3X5; Q5YB57; Q5YB58
UniRef90_O75978	Cluster: L1 capsid protein (Fragment)	100	4	Homo sapiens (Human); Human papillomavirus	O75978; O72140; Q709Q9; O11279
UniRef90_O75979	Cluster: L1 capsid protein (Fragment)	105	2	Homo sapiens (Human); Human papillomavirus	O75979; Q6DKY6
UniRef90_P03073	Cluster: Large T antigen	785	4	Murine polyomavirus (strain A2) (MPyV); Murine polyomavirus (strain 3) (MPyV); Mus musculus (Mouse); Murine polyomavirus (strain Crawford small-plaque) (MPyV)	P03073; P03074; Q04187; P12905
UniRef90_Q02417	Cluster: M2-1 protein	362	3	Saccharomyces cerevisiae (Baker's yeast); Killer virus of S.cerevisiae	Q02417; Q87020; Q03953
UniRef90_P13369	Cluster: Macrophage colony-stimulating factor 1 receptor	980	3	Felis catus (Cat) (Felis silvestris catus); Feline sarcoma virus (strain McDonough); Ailuropoda melanoleuca (Giant panda)	P13369; P00545; D2H8M3
UniRef90_P36741	Cluster: Major capsid protein L1	539	9	Human papillomavirus type 45; Homo sapiens (Human)	P36741; Q4JJY5; A9XFM1; Q9Y4Y5; A9XFU3; A9XFM9; A9XFN7; A9XFR1; A9XFT5
UniRef90_Q90603	Cluster: MDV alpha TIF	427	4	Gallus gallus (Chicken); Infectious laryngotracheitis virus (ILTV) (Gallid herpesvirus 1); Gallid herpesvirus 2 (strain Chicken/Md5/ATCC VR-987) (GaHV-2) (Marek's disease herpesvirus type 1); Gallid herpesvirus 2	Q90603; Q69319; Q77MR5; Q77Q57
UniRef90_P03076	Cluster: Middle T antigen	421	4	Murine polyomavirus (strain 3) (MPyV); Murine polyomavirus (strain A2) (MPyV); Murine polyomavirus (strain Crawford small-plaque) (MPyV); Mus musculus (Mouse)	P03076; P03077; P12906; Q04188
UniRef90_Q78DZ9	Cluster: MMTV1orf/sag transmembrane protein type II (Fragment)	310	6	Mus musculus (Mouse); Mouse mammary tumor virus (MMTV)	Q78DZ9; Q83395; Q98345; Q78E00; Q78E01; Q78E02
UniRef90_P01106	Cluster: Myc proto-oncogene protein	439	36	Homo sapiens (Human); Mus musculus (Mouse); Sus scrofa (Pig); Canis familiaris (Dog) (Canis lupus familiaris); Felis catus (Cat) (Felis silvestris catus); Feline leukemia virus; Pteropus hypomelanus (Island flying fox) (Variable flying fox); Pan troglodytes (Chimpanzee); Rattus norvegicus (Rat); Bos taurus (Bovine); Galeopterus variegatus (Malayan flying lemur) (Cynocephalus variegatus); Hylobate…	P01106; UPI0000D624FF; UPI0000D62FF2; C4P6P7; UPI0001596AB0; UPI00004BBE63; D3U662; Q85523; Q9MZT8; P23583; UPI0001884BE1; P09416; UPI0000DBF8EA; P01108; UPI0001CF7402; Q29031; UPI0001596AAF; Q2HJ27; Q28350; P68271; P68272; Q9MZU0; P49033; B8XIA5; P22555; A1YG22; A2T7L5; Q28566; Q9MZT7; Q9MZT9; P49032; Q9MZT6; UPI0001CE1050; P21438; UPI0001796828; B4E1N7
UniRef90_P01109	Cluster: Myc proto-oncogene protein	416	10	Gallus gallus (Chicken); Avian carcinoma virus; Avian retrovirus; Avian myelocytomatosis virus MC29; Avian myelocytomatosis virus; Avian myelocytomatosis virus CMII; Avian myelocytomatosis virus HBI; Avian retrovirus OK10; Avian retrovirus MH2E21; Avian retrovirus MH2	P01109; Q85456; Q00089; P01110; UPI0000233651; P10395; P06295; P12523; P0C0N8; P0C0N9
UniRef90_P40931	Cluster: Myeloproliferative leukemia protein	184	4	Myeloproliferative leukemia virus (MpLV); Oryctolagus cuniculus (Rabbit); Bos taurus (Bovine); Bubalus bubalis (Domestic water buffalo)	P40931; Q1ERS5; C9E1C0; C8CJH3
UniRef90_P87889	Cluster: Nucleocapsid protein	666	11	Homo sapiens (Human); Human endogenous retrovirus K	P87889; Q4JNY4; P63145; P63130; P62683; Q7LDI9; Q9YNA8; P63126; P62684; Q96897; P62685
UniRef90_P03336	Cluster: Nucleocapsid protein p10	537	18	AKV murine leukemia virus (AKR (endogenous) murine leukemia virus); Murine type C retrovirus; Murine leukemia virus (strain BM5 eco); Radiation murine leukemia virus; Mus musculus (Mouse); Murine leukemia virus	P03336; Q85734; P29167; P11269; Q1KYL8; Q1KYM1; Q60588; Q8BFR9; Q8C1W7; Q1KYL5; Q4W673; Q4W675; Q83361; Q83383; Q83397; Q900B1; Q9Q9A6; Q9WHV6
UniRef90_Q2F7J2	Cluster: Nucleocapsid protein p10	536	6	Xenotropic MuLV-related virus (isolate VP35) (XMRV); Xenotropic MuLV-related virus (isolate VP42) (XMRV); Xenotropic MuLV-related virus (isolate VP62) (XMRV); Xenotropic MuLV-related virus; Mus musculus (Mouse); Murine AIDS virus-related provirus	Q2F7J2; Q2F7I9; Q27ID9; D0UFA4; Q6YIY0; Q86963
UniRef90_B9EHT2	Cluster: Olfr780 protein	402	92	Mus musculus (Mouse); Escherichia coli; Sus scrofa (Pig); Glyptapanteles indiensis; Homo sapiens (Human); Uncultured archaeon; Saccharomyces cerevisiae (strain YJM789) (Baker's yeast); Trypanosoma brucei; Oryza sativa subsp. japonica (Rice); Arabidopsis thaliana (Mouse-ear cress); Medicago truncatula (Barrel medic); Nicotiana attenuata; Yersinia ruckeri; Bacillus anthracis str. A0488; Bacillus an…	B9EHT2; Q70BL4; Q56P29; B7S8S5; Q6AW98; D1JA43; A7A2C4; Q583L2; C7J8H8; Q0WNB8; Q2HVY7; Q84UU1; A4IUI1; B0APA9; B0QLI4; B6RFM6; D0FZT0; D0U532; Q6A281; Q6J726; Q6MXH9; Q79VX5; Q7BQ34; Q7DJN8; Q8GC95; A4V9K8; A6TK18; B1LEU0; B3GYY5; B6EHK5; C6EB92; D3E7J6; Q3JYL3; Q57RA2; D3ZLJ1; Q6QMY8; Q56368; Q7AK80; Q9E8P4; Q5ZJU7; A4KWT9; Q53371; A2QU47; Q2HUF2; A1XWX6; A4VC23; A7JWM4; B1V8C9; B5M9K1; Q7BN10;…
UniRef90_C0KDW4	Cluster: ORFIII polyprotein (Fragment)	198	14	Banana streak virus; Musa acuminata subsp. zebrina; Musa acuminata subsp. burmannicoides; Musa AAB Group; Musa acuminata subsp. malaccensis; Musa banksii (Banana)	C0KDW4; C0KDW7; C0KDX3; A7UM63; C0KDX4; C0KDX5; C0KDX6; A7UM62; A7UM64; Q6Y2G5; Q6Y2G6; Q6Y2H9; Q6Y2J6; Q6Y2J9
UniRef90_C0KDW5	Cluster: ORFIII polyprotein (Fragment)	199	30	Banana streak virus; Musa balbisiana (Banana); Banana streak OL virus; Sugarcane bacilliform virus; Musa AAB Group	C0KDW5; C0KDW6; C0KDX0; C0KDW8; Q6Y2H1; C0KDW9; C0KDX7; A7UKS7; Q4W0U6; Q4W0U7; D0QEF6; C0KDX2; Q6Y2H0; Q6Y2H7; Q6Y2I7; A7UKR8; Q4W0T4; Q4W0T5; Q4W0T6; Q4W0T7; Q4W0T8; Q4W0T9; Q4W0U1; Q4W0U2; Q4W0U3; Q4W0U4; Q4W0U5; Q4W0U8; Q4W0U9; B0RKI4
UniRef90_C0KDX1	Cluster: ORFIII polyprotein (Fragment)	199	6	Banana streak virus; Musa balbisiana (Banana); Musa AAB Group; Banana streak Uganda G virus	C0KDX1; Q6Y2G9; Q6Y2H6; Q6Y2I3; Q4W0P7; Q4W0P8
UniRef90_A7UM65	Cluster: ORFIII-like polyprotein (Fragment)	181	4	Musa acuminata subsp. zebrina; Musa acuminata subsp. burmannicoides; Musa acuminata subsp. malaccensis; Banana streak Uganda D virus	A7UM65; Q6Y2G3; Q6Y2J4; Q4W0Q3
UniRef90_Q6Y2G8	Cluster: ORFIII-like polyprotein (Fragment)	181	10	Musa acuminata subsp. burmannicoides; Musa AAB Group; Musa banksii (Banana); Banana streak Uganda F virus; Banana streak Uganda E virus; Banana streak Uganda B virus	Q6Y2G8; Q6Y2I0; Q6Y2I6; Q6Y2J8; Q6Y2K0; Q4W0P9; Q4W0Q0; Q4W0Q5; Q4W0Q1; Q4W0Q2
UniRef90_Q6Y2H2	Cluster: ORFIII-like polyprotein (Fragment)	181	3	Musa balbisiana (Banana); Banana streak Uganda C virus	Q6Y2H2; Q6Y2H8; Q4W0Q4
UniRef90_Q6Y2I1	Cluster: ORFIII-like polyprotein (Fragment)	181	2	Musa AAB Group; Banana streak virus	Q6Y2I1; C5IGV9
UniRef90_Q6Y2I2	Cluster: ORFIII-like polyprotein (Fragment)	181	4	Musa AAB Group; Dioscorea bacilliform virus	Q6Y2I2; B0AZZ1; B0B000; B0B010
UniRef90_Q6Y2J5	Cluster: ORFIII-like polyprotein (Fragment)	181	2	Musa acuminata subsp. malaccensis; Musa acuminata endogenous badnavirus	Q6Y2J5; C6FFC0
UniRef90_A9LHJ6	Cluster: Orf-x	166	23	Ovis aries (Sheep); Sheep pulmonary adenomatosis virus (Jaagsiekte sheep retrovirus) (JSRV); Endogenous sheep retrovirus	A9LHJ6; A9LHK1; A9LHK6; A9LHL8; A9LHM1; A9LHM6; Q9IBY3; A9LHN1; A9LHN6; A9LHP8; A9LHQ0; Q9YN95; Q9YN96; Q9IC97; Q9ICA7; Q9TUZ5; Q9XT39; Q9IC91; Q9IC92; Q9IC93; Q9TUZ3; Q9XT36; Q9XT37
UniRef90_Q67V00	Cluster: Os09g0452700 protein	140	8	Oryza sativa subsp. japonica (Rice); Oryza sativa subsp. indica (Rice); Esox lucius (Northern pike); Paramecium bursaria Chlorella virus NY2A (PBCV-NY2A); Nosema ceranae (strain BRL01) (Microsporidian parasite); Rattus norvegicus (Rat); Hediste diversicolor (Sandworm) (Nereis diversicolor); Oryza sativa (Rice)	Q67V00; A2Z1X7; C1BWM3; A7IXM4; C4V737; UPI0000DA3961; B0B030; Q9M646
UniRef90_P31622	Cluster: p4	612	21	Sheep pulmonary adenomatosis virus (Jaagsiekte sheep retrovirus) (JSRV); Ovis aries (Sheep); Ovine enzootic nasal tumour virus; Enzootic nasal tumour virus of goats	P31622; A9LHI8; A9LHJ3; A9LHJ8; A9LHL3; A9LHM0; A9LHM7; A9LHM8; A9LHN2; A9LHP4; Q09PL2; Q9N1S0; Q9TTD5; A9LHN7; D3GGN4; D3GGN8; D3GGP6; Q9WJ20; Q7SMF1; Q95N68; Q9WR75
UniRef90_Q7T839	Cluster: P494	494	2	Glyptapanteles indiensis bracovirus; Glyptapanteles indiensis	Q7T839; A0JCV0
UniRef90_P42336	Cluster: Phosphatidylinositol-4,5-bisphosphate 3-kinase catalytic subunit alpha isoform	1068	13	Homo sapiens (Human); Avian sarcoma virus 16; Canis familiaris (Dog) (Canis lupus familiaris); Rattus norvegicus (Rat); Danio rerio (Zebrafish) (Brachydanio rerio); Gallus gallus (Chicken); Xenopus tropicalis (Western clawed frog) (Silurana tropicalis)	P42336; Q4LE51; O39483; UPI0001CF4741; UPI0000EB0C86; UPI0001B7BA7E; UPI0000F1F225; UPI0000E4ED67; UPI0000436300; UPI0001A2C10F; O42391; UPI0000ECB16A; B0BLW6
UniRef90_A5GIM7	Cluster: Photosystem Q(B) protein 1	359	28	Synechococcus sp. (strain WH7803); Synechococcus sp. (strain WH7805); Synechococcus phage syn9; Cyanophage S-BM4; Synechococcus phage S-WHM1; Cyanophage S-RSM28; Synechococcus sp. (strain WH8102); Synechococcus sp. (strain RCC307); Synechococcus sp. (strain CC9311); Synechococcus sp. (strain CC9605); Synechococcus sp. WH 8109; Synechococcus sp. (strain CC9902); Synechococcus sp. BL107; Paulinella…	A5GIM7; A4CQX7; Q0QZ10; Q6H949; Q6H953; Q6KCC6; Q7TTJ7; A5GTY4; Q0I7J2; Q0I912; Q3AM89; D0CL47; Q3AV15; Q05Z16; Q7U4Z3; A1XYT5; A1XYU6; C7BUY9; Q6H946; Q7Y4H5; A3Z8Q9; B5ILW4; Q05QI4; Q9WWN3; Q3AYB8; Q6H957; Q6SL63; Q065Z9
UniRef90_P07621	Cluster: Plasmid Partition par B protein	343	5	Escherichia coli; Xenopus tropicalis (Western clawed frog) (Silurana tropicalis); Enterobacteria phage P1 (Bacteriophage P1); Escherichia coli O111:H- (strain 11128 / EHEC)	P07621; UPI00004DB3F2; Q38420; C8UR50; UPI00006A1DBC
UniRef90_Q86UH8	Cluster: Pol protein	1183	2	Homo sapiens (Human); Human endogenous retrovirus HCML-ARV	Q86UH8; Q7ZGS3
UniRef90_Q85470	Cluster: Pol protein (Fragment)	64	5	Rous sarcoma virus; Gallus gallus (Chicken); Avian myeloblastosis associated virus (MAV)	Q85470; UPI0000E82306; Q85482; Q85624; Q64991
UniRef90_O15313	Cluster: Polymerase (Fragment)	201	30	Homo sapiens (Human); Human endogenous retrovirus K; Human endogenous retrovirus	O15313; O15310; Q3LV85; Q3LV87; Q3LV90; Q3LV91; Q3LV96; O15311; Q86599; Q71VD1; Q3LV82; Q3LV83; Q69004; Q3LV84; Q3LV86; Q3LV88; Q3LV89; Q3LV92; Q3LV93; Q3LV97; Q3LV95; Q6QAJ4; Q6QAJ7; Q68994; Q68995; Q68996; Q69002; Q69003; Q6QAJ0; Q6QAJ2
UniRef90_Q08GQ0	Cluster: Polyprotein	1719	20	Sus scrofa (Pig); Porcine endogenous retrovirus; Porcine endogenous retrovirus B; Porcine endogenous retrovirus A; Porcine endogenous retrovirus C; Porcine endogenous retrovirus C/A	Q08GQ0; A8NBZ0; Q9Q1X4; Q9Q1X3; Q9Q1X5; Q8J4V6; Q8J4V8; Q08GP8; Q90RL6; Q5QGQ8; Q90RL9; Q8UM96; C0IV22; Q8UMP5; Q9XSN8; Q4VFZ2; A1YTJ2; Q8UM99; Q8Q6U4; Q8Q6U7
UniRef90_Q9WR85	Cluster: Polyprotein (Fragment)	177	4	Bovine viral diarrhea virus 2 (BVDV-2); Tragopogon porrifolius (Salsify); Polyplastron multivesiculatum	Q9WR85; D5JWS8; Q1RQF1; Q1RQE8
UniRef90_Q9XS27	Cluster: Polyprotein (Fragment)	309	3	Sus scrofa (Pig); Sus scrofa domestica (domestic pig); Porcine endogenous retrovirus C	Q9XS27; P87375; O56219
UniRef90_P06426	Cluster: Probable protein E5	75	3	Human papillomavirus type 33; Homo sapiens (Human)	P06426; B9UPD6; Q8WXV7
UniRef90_P11365	Cluster: Protease	827	2	Mouse intracisternal a-particle MIA14 (IAP-MIA14); Mus musculus (Mouse)	P11365; Q61213
UniRef90_D3GGN5	Cluster: Protease (Fragment)	308	21	Ovine enzootic nasal tumour virus; Ovis aries (Sheep); Enzootic nasal tumour virus of goats; Sheep pulmonary adenomatosis virus (Jaagsiekte sheep retrovirus) (JSRV)	D3GGN5; D3GGN9; D3GGP3; Q09PL1; D3GGP7; D3GGQ1; Q7SMF0; Q95N67; Q9WR74; A9LHN8; A9LHI5; A9LHI9; A9LHJ4; A9LHJ9; A9LHM9; A9LHN4; A9LHP5; Q9N1R9; Q9TTD2; Q9TTD4; Q09PK9
UniRef90_O62627	Cluster: Protease (Fragment)	91	22	Sus scrofa (Pig); Porcine endogenous retrovirus; Porcine endogenous retrovirus M16; Porcine endogenous retrovirus FPP-1	O62627; O36219; Q90DY3; Q90DY6; O62628; O62629; Q6TH85; O62630; O62631; O62632; O62633; O62634; O62635; O62636; O62859; O97794; O97795; O97796; Q9TSH9; Q6TLI8; Q6TH86; Q6U5G6
UniRef90_P03322	Cluster: Protease p15	701	24	Rous sarcoma virus (strain Prague C) (RSV-PrC); Rous sarcoma virus; Avian leukosis virus (ALV); Gallus gallus (Chicken); Rous sarcoma virus (strain Schmidt-Ruppin B) (RSV-SRB); Avian leukosis virus HPRS103; Avian leukosis virus LR-9; Avian myeloblastosis-associated virus 1/2; Avian myeloblastosis-associated virus type 2; Avian myeloblastosis-associated virus type 1; Avian myeloblastosis virus; Ro…	P03322; Q77YH0; A2SXN8; B1Q2X9; Q03852; Q03853; A4LA60; B3TFE1; B3TFE4; B3TFE7; B6EA48; O92954; Q03858; Q45TR3; Q64996; Q6V5L6; Q76VV4; Q89810; Q7SQ99; Q83131; Q86830; Q90LU2; Q98WW0; Q64992
UniRef90_P06463	Cluster: Protein E6	158	36	Human papillomavirus type 18; Homo sapiens (Human)	P06463; Q76Z97; A9XFB0; A9XFE2; A9XFJ0; D3ITV5; Q8V9K7; Q8V9L0; Q9QNP8; Q4KT80; Q4KT81; Q4KT82; Q4KT83; Q4KT84; Q4KT85; Q4KT86; Q4KT87; Q4KT88; Q4KT89; Q4KT90; Q4KT91; Q4KT92; Q4KT93; Q4KT94; Q4KT95; Q4KT96; Q4KT97; Q4KT98; Q4KT99; Q4KTA0; Q4KTA1; Q4KTA2; Q4KTA3; Q4KTA4; Q4KTA5; Q8V9K8
UniRef90_P21735	Cluster: Protein E6	158	8	Human papillomavirus type 45; Homo sapiens (Human)	P21735; A9XFL4; Q9Y4Y4; O10608; A9XFM2; A9XFN8; A9XFT6; A9XFU4
UniRef90_P06788	Cluster: Protein E7	105	10	Human papillomavirus type 18; Homo sapiens (Human)	P06788; Q8V9K9; A9XFI3; A9XFF1; A9XFJ1; D3ITV6; Q76Z96; Q9QNP5; Q9QNP6; Q9QNP7
UniRef90_P21736	Cluster: Protein E7	106	6	Human papillomavirus type 45; Homo sapiens (Human)	P21736; A9XFL5; Q9Y4Y3; O10609; A9XFQ5; A9XFS9
UniRef90_B5AF37	Cluster: Protein kinase C delta (Fragment)	104	7	Sus scrofa (Pig); Rous sarcoma virus; Taeniopygia guttata (Zebra finch) (Poephila guttata); Mus musculus (Mouse); Coturnix coturnix (Common quail); Gallus gallus (Chicken); Phoca vitulina (Harbor seal)	B5AF37; Q85729; UPI000194E477; Q8C6U9; Q08557; UPI0000ECBD57; Q6IZB1
UniRef90_P03321	Cluster: Protein PR73 5'-endogenous	324	16	Mouse mammary tumor virus (strain GR) (MMTV); Mouse mammary tumor virus (MMTV); Mouse mammary tumor virus (strain BR6) (MMTV); Mus musculus (Mouse); Endogenous mouse mammary tumor virus 30; Mouse mammary tumor virus 17	P03321; Q83396; Q83408; Q89534; P10260; Q77YH1; P10261; A6H6V5; Q61912; Q61915; Q66758; Q9WHW0; Q774W7; Q86678; Q86679; Q98343
UniRef90_P0C205	Cluster: Protein Rex	189	49	Human T-cell leukemia virus 1 (strain Japan ATK-1 subtype A) (HTLV-1); Human T-lymphotropic virus 1; Human T-cell leukemia virus 1 (isolate Caribbea HS-35 subtype A) (HTLV-1); Human T-cell leukemia virus 1 (isolate Zaire EL subtype B) (HTLV-1); Simian T-lymphotropic virus 1; Chlorocebus pygerythrus hilgerti	P0C205; Q82233; P0C206; P0C206-2; P0C207; P0C207-2; C6L850; Q80818; Q9IWU8; Q6KET0; Q6KET1; Q6KET2; Q6KET3; Q6KET4; Q6KET5; Q6KET6; Q6KET7; Q6KET8; Q6KET9; Q82445; P0C205-2; B1VJM6; Q80789; Q80815; Q82198; Q82204; Q82222; Q82226; Q88332; Q88362; O36260; Q6BEH6; Q6BEH8; Q6BEI0; Q6BEI2; Q6BEI4; Q6BEI6; Q6BEI8; Q6BEJ0; Q6BEJ2; Q88335; Q6BEJ4; Q6BEJ6; Q6WV38; Q6WV43; O90649; Q6KES7; Q6KES8; Q6KES9
UniRef90_P62559	Cluster: Protein sopB	323	31	Escherichia coli O157:H7; Escherichia coli (strain K12); Vibrio cholerae V52; Escherichia coli O157:H7 str. EC4196; Escherichia coli O157:H7 str. EC4113; Escherichia coli O157:H7 str. EC4076; Escherichia coli O157:H7 str. EC4401; Escherichia coli O157:H7 str. EC4486; Escherichia coli O157:H7 str. EC4501; Escherichia coli O157:H7 str. EC869; Escherichia coli O157:H7 str. EC508; Escherichia coli O1…	P62559; P62558; A1ET56; B2NWC9; B2PDH8; B2PQL8; B3ABE8; B3API5; B3BA49; B3BP28; B3C4N5; B7A4P3; C5ZZH6; Q799C4; A7ZH40; B5YPD7; C6V3G3; D2K3X4; UPI00006A1DC1; B1VC49; B3X2K5; D4HR51; Q573V1; Q5QJJ1; Q849W3; B4TLH0; C1HUA5; B1LRQ3; B7LI39; Q27TL8; UPI0001CF6D42
UniRef90_B7S8N1	Cluster: Protein tyrosine phosphatase	320	2	Glyptapanteles flavicoxis; Glyptapanteles indiensis bracovirus	B7S8N1; B8PQ49
UniRef90_B7S8Q8	Cluster: Protein tyrosine phosphatase	288	3	Glyptapanteles flavicoxis; Glyptapanteles indiensis; Glyptapanteles indiensis bracovirus	B7S8Q8; B7S8Z4; Q2THV1
UniRef90_B7S8X7	Cluster: Protein tyrosine phosphatase	314	2	Glyptapanteles indiensis; Glyptapanteles flavicoxis bracovirus	B7S8X7; B8PQ77
UniRef90_B7S8Y9	Cluster: Protein tyrosine phosphatase	298	2	Glyptapanteles indiensis; Glyptapanteles indiensis bracovirus	B7S8Y9; Q2THV5
UniRef90_B7S8Z0	Cluster: Protein tyrosine phosphatase	296	2	Glyptapanteles indiensis; Glyptapanteles indiensis bracovirus	B7S8Z0; Q2THU7
UniRef90_B7S8Z3	Cluster: Protein tyrosine phosphatase	280	2	Glyptapanteles indiensis; Glyptapanteles indiensis bracovirus	B7S8Z3; Q2THV0
UniRef90_B7S8Z5	Cluster: Protein tyrosine phosphatase	310	3	Glyptapanteles indiensis; Glyptapanteles indiensis bracovirus; Glyptapanteles flavicoxis	B7S8Z5; Q2THV2; B7S8Q9
UniRef90_B7S8Z6	Cluster: Protein tyrosine phosphatase	319	2	Glyptapanteles indiensis; Glyptapanteles indiensis bracovirus	B7S8Z6; Q2THV3
UniRef90_B7S8Z7	Cluster: Protein tyrosine phosphatase	298	2	Glyptapanteles indiensis; Glyptapanteles indiensis bracovirus	B7S8Z7; Q2THV4
UniRef90_B7S8Z8	Cluster: Protein tyrosine phosphatase	297	2	Glyptapanteles indiensis; Glyptapanteles indiensis bracovirus	B7S8Z8; Q805S1
UniRef90_P31624	Cluster: Protein Vpu	166	12	Sheep pulmonary adenomatosis virus (Jaagsiekte sheep retrovirus) (JSRV); Ovis aries (Sheep)	P31624; Q95N65; Q9YNA1; Q9WR72; A9LHI6; A9LHJ1; Q9IC99; Q9ICA1; Q9ICA3; Q9ICA5; Q9ICA9; Q9YN98
UniRef90_P11939	Cluster: Proto-oncogene c-Fos	367	4	Gallus gallus (Chicken); Avian retrovirus NK24; Taeniopygia guttata (Zebra finch) (Poephila guttata); Coturnix coturnix (Common quail)	P11939; P23050; UPI000194C8F1; Q8JIB3
UniRef90_P00536	Cluster: Proto-oncogene serine/threonine-protein kinase mos	390	16	Mus musculus (Mouse); Moloney murine sarcoma virus (strain m1) (MoMSV); Murine leukemia virus; Moloney murine sarcoma virus (strain HT-1) (MoMSV); Moloney murine sarcoma virus (MoMSV); Moloney murine leukemia virus (MoMLV); Moloney murine sarcoma virus (strain ts110) (MoMSV); Myeloproliferative sarcoma virus (isolate ts159); Myeloproliferative sarcoma virus; Rattus norvegicus (Rat)	P00536; Q61886; Q78EH5; P00537; Q8JE84; P07331; A6H643; P00538; Q6LDV2; P32593; Q85651; UPI0000233355; P10421; Q83745; UPI00001CF631; P00539
UniRef90_P12931	Cluster: Proto-oncogene tyrosine-protein kinase Src	536	41	Homo sapiens (Human); Avian sarcoma virus (strain PR2257); Avian sarcoma virus PR2257/16; Avian sarcoma virus (strain S1); Avian sarcoma virus (strain S2); Canis familiaris (Dog) (Canis lupus familiaris); Ailuropoda melanoleuca (Giant panda); Rattus norvegicus (Rat); Bos taurus (Bovine); Sus scrofa (Pig); Mus musculus (Mouse); Monodelphis domestica (Short-tailed gray opossum); Macaca mulatta (Rhe…	P12931; P15054; Q64817; P14084; P14085; UPI0000EB0EE6; D2H117; Q9JJ10; P12931-2; UPI00005BE074; UPI00005A44E6; UPI00017EFA1F; P05480; Q2M4I4; UPI00005E82C9; Q9WUD9; Q45QJ2; UPI000019BB2F; UPI00005A44E7; UPI0000D9C6D6; Q3UKD6; Q80XU2; O92957; P00523; UPI00005E82CA; UPI000194D9F7; UPI0000ECA88D; P00525; P00524; P25020; P00526; O92806; UPI000023365D; P63185; O93080; Q07461; Q60567; Q64993; Q64994; P…
UniRef90_P07947	Cluster: Proto-oncogene tyrosine-protein kinase Yes	543	29	Homo sapiens (Human); Canis familiaris (Dog) (Canis lupus familiaris); Pongo abelii (Sumatran orangutan); Macaca mulatta (Rhesus macaque); Gallus gallus (Chicken); Mus musculus (Mouse); Bos taurus (Bovine); Ailuropoda melanoleuca (Giant panda); Rattus norvegicus (Rat); Monodelphis domestica (Short-tailed gray opossum); Equus caballus (Horse); Taeniopygia guttata (Zebra finch) (Poephila guttata); …	P07947; D3DUH1; UPI0000EB38D3; B2RA70; Q5REC4; UPI0000D9E7E9; P09324; Q04736; Q3TJI7; A7MB57; D2HJY2; Q8C762; Q8CBP1; Q99PW1; UPI000060FC0D; UPI0000DBF448; UPI00004A4CB4; UPI0000F2C55C; UPI000155ECF1; UPI000194BC3E; UPI0001CE2F0A; Q28923; UPI0000E24C92; P10936; Q28CN2; Q498G3; Q640S9; Q6PF70; P00527
UniRef90_Q2THU9	Cluster: PTP8	320	2	Glyptapanteles indiensis bracovirus; Glyptapanteles indiensis	Q2THU9; B7S8Z2
UniRef90_B7S8B5	Cluster: Putative uncharacterized protein	801	2	Glyptapanteles flavicoxis; Glyptapanteles flavicoxis bracovirus	B7S8B5; B8PQ75
UniRef90_B7S8B6	Cluster: Putative uncharacterized protein	250	2	Glyptapanteles flavicoxis; Glyptapanteles flavicoxis bracovirus	B7S8B6; B8PQ74
UniRef90_B7S8B7	Cluster: Putative uncharacterized protein	1187	2	Glyptapanteles flavicoxis; Glyptapanteles flavicoxis bracovirus	B7S8B7; B8PQ73
UniRef90_B7S8M4	Cluster: Putative uncharacterized protein	93	2	Glyptapanteles flavicoxis; Glyptapanteles flavicoxis bracovirus	B7S8M4; B8PQ61
UniRef90_B7S8M5	Cluster: Putative uncharacterized protein	121	2	Glyptapanteles flavicoxis; Glyptapanteles flavicoxis bracovirus	B7S8M5; B8PQ72
UniRef90_B7S8M6	Cluster: Putative uncharacterized protein	90	2	Glyptapanteles flavicoxis; Glyptapanteles flavicoxis bracovirus	B7S8M6; B8PQ71
UniRef90_B7S8N2	Cluster: Putative uncharacterized protein	205	3	Glyptapanteles flavicoxis; Glyptapanteles indiensis; Glyptapanteles indiensis bracovirus	B7S8N2; B7S995; B8PQ48
UniRef90_B7S950	Cluster: Putative uncharacterized protein	95	2	Glyptapanteles indiensis; Glyptapanteles flavicoxis bracovirus	B7S950; B8PQ67
UniRef90_P06956	Cluster: Recombinase cre	343	8	Enterobacteria phage P1 (Bacteriophage P1); Cricetulus griseus (Chinese hamster); Human cytomegalovirus (HHV-5) (Human herpesvirus 5); Enterobacteria phage phiW39; Enterobacteria phage P7 (Bacteriophage P7); Escherichia coli; Escherichia coli O111:H- (strain 11128 / EHEC)	P06956; Q71TG5; Q7M0H5; D2K3X3; Q5QBN6; Q5XLQ5; Q5QBM7; C8UQZ9
UniRef90_P62538	Cluster: Replication initiation protein	251	23	Escherichia coli; Salmonella typhi; Salmonella paratyphi A (strain AKU_12601); Escherichia coli O111:H- (strain 11128 / EHEC); Klebsiella pneumoniae; Escherichia coli (strain K12); Populus trichocarpa (Western balsam poplar) (Populus balsamifera subsp. trichocarpa); Vibrio cholerae V52; Uncultured bacterium; Salmonella typhimurium; Human cytomegalovirus (HHV-5) (Human herpesvirus 5); Psychromonas…	P62538; P62539; Q7BLC2; A4V9H1; C8UQJ0; Q0QC79; UPI0001CF688F; P03856; B9NCR8; A1ETG5; D4HR53; Q0E856; Q573V3; Q5QJG7; D2K3X6; Q1ZBH9; C6V3G1; B2PDH5; B5RKP9; UPI0001CF6D40; Q9KI74; Q9KI75; Q9KI73
UniRef90_P19654	Cluster: Replication protein repL	281	4	Enterobacteria phage P1 (Bacteriophage P1); Escherichia coli O111:H- (strain 11128 / EHEC); Xenopus tropicalis (Western clawed frog) (Silurana tropicalis)	P19654; Q71TB9; C8UR42; UPI00006A1DBD
UniRef90_P11370	Cluster: Retrovirus-related Env polyprotein from Fv-4 locus	679	3	Mus musculus (Mouse); Mus musculus castaneus (Southeastern Asian house mouse); Cas-Br-E murine leukemia virus	P11370; Q91Y75; P08360
UniRef90_O14749	Cluster: Reverse transcriptase (Fragment)	81	5	Homo sapiens (Human); Human endogenous retrovirus K; Human endogenous retrovirus	O14749; Q3LV73; Q3LV80; Q3LV81; Q69008
UniRef90_O14750	Cluster: Reverse transcriptase (Fragment)	81	2	Homo sapiens (Human); Human endogenous retrovirus K	O14750; Q69001
UniRef90_Q0PKG6	Cluster: Reverse transcriptase (Fragment)	573	2	Homo sapiens (Human); Human endogenous retrovirus	Q0PKG6; Q69013
UniRef90_Q6QMZ0	Cluster: Ribosomal protein S27a (Fragment)	115	10	Chinchilla lanigera (Long-tailed chinchilla) (Chinchilla villidera); Gallus gallus (Chicken); Pan troglodytes (Chimpanzee); Mus musculus (Mouse); Ictalurus punctatus (Channel catfish); Ovis aries (Sheep); Ailuropoda melanoleuca (Giant panda); Canarypox virus (CNPV); Pagrus major (Red sea bream) (Chrysophrys major)	Q6QMZ0; UPI0000ECC732; UPI00004920D6; UPI00001951D3; UPI00015529F5; Q2I193; Q6Q292; D2HFP1; Q6VZQ1; Q6Y264
UniRef90_P03386	Cluster: R-peptide	669	16	AKV murine leukemia virus (AKR (endogenous) murine leukemia virus); Mus musculus (Mouse); Murine leukemia virus; Radiation murine leukemia virus; Radiation murine leukemia virus (strain Kaplan)	P03386; P70356; Q04586; Q1KYM0; Q2HJ08; Q60589; Q61919; Q1KYL4; Q4W672; Q4W674; Q7SVK6; Q83382; Q9DQ24; P11268; P31794; Q90RL3
UniRef90_P03388	Cluster: R-peptide	640	39	Mink cell focus-forming murine leukemia virus (isolate CI-3); Murine leukemia virus; Rauscher mink cell focus-inducing virus; Murine leukemia virus SL3-2; Friend mink cell focus-inducing virus; Mink cell focus-forming murine leukemia virus; Mus musculus (Mouse); Friend murine leukemia virus (FrMLV)	P03388; Q83363; P06445; Q9WHV5; Q6T3B1; Q9DQ21; Q85630; P15073; Q6WP40; Q6WP41; Q6WP42; Q6WP43; Q83365; Q85506; Q9WHJ7; Q61877; Q80SW4; Q811N1; Q811N3; Q811N6; C9DRA8; Q61876; Q5MNP4; Q5MNN0; Q5MNK6; Q5MNK8; Q5MNL0; Q5MNL4; Q5MNL8; Q5MNM2; Q5MNM4; Q5MNM6; Q5MNM8; Q5MNN2; Q5MNN4; Q5MNK2; Q5MNL2; Q5MNM0; Q5MNP2
UniRef90_P31791	Cluster: R-peptide	671	2	Feline endogenous virus ECE1; Felis catus (Cat) (Felis silvestris catus)	P31791; Q9XSY3
UniRef90_P03387	Cluster: R-peptide (Fragment)	211	10	FBJ murine osteosarcoma virus (FBJ-MSV) (Finkel-Biskis-Jinkins murine osteosarcoma virus); Kirsten murine leukemia virus (KiMSV); Murine leukemia virus; Mus musculus (Mouse); Moloney murine leukemia virus (MoMLV); Abelson murine leukemia virus; N-tropic ecotropic endogenous retrovirus; Kirsten murine sarcoma virus	P03387; P04502; Q85640; Q61977; UPI000014C960; UPI0000DA0862; UPI00001637A0; Q03802; Q85454; Q85615
UniRef90_P10533	Cluster: Serine/threonine-protein kinase-transforming protein Rmil	367	3	Avian retrovirus IC10; Homo sapiens (Human); Mus musculus (Mouse)	P10533; UPI0001B7927F; P28028-2
UniRef90_P03715	Cluster: Small outer capsid protein	80	5	Enterobacteria phage T4 (Bacteriophage T4); Enterobacteria phage AR1 (Bacteriophage AR1); Siniperca chuatsi (Chinese perch); Enterobacteria phage PP01; Enterobacteria phage RB15 (Bacteriophage RB15)	P03715; D4Z9H7; Q2KKU2; Q6X9P1; Q94MW4
UniRef90_P68834	Cluster: Small t antigen	195	9	Murine polyomavirus (strain 3) (MPyV); Murine polyomavirus (strain A2) (MPyV); Murine polyomavirus (strain Crawford small-plaque) (MPyV); Murine polyomavirus; Polyomavirus; Murine polyomavirus strain BG; Mus musculus (Mouse)	P68834; P68835; P0C567; Q76TX0; Q84854; Q8V9F4; Q04190; Q84251; Q9IBN0
UniRef90_P03643	Cluster: Spike protein G	175	36	Enterobacteria phage phiX174 (Bacteriophage phi-X174); Enterobacteria phage S13 (Bacteriophage S13); Enterobacteria phage WA11; Enterobacteria phage WA10; Enterobacteria phage WA4; Enterobacteria phage NC56; Enterobacteria phage NC51; Enterobacteria phage NC41; Enterobacteria phage NC37; Enterobacteria phage NC16; Enterobacteria phage NC11; Enterobacteria phage NC5; Enterobacteria phage ID34; Ent…	P03643; C3V8X8; P07932; A3FJA7; A3FJB8; A3FJE0; A3FJF1; A3FJG2; A3FJH3; A3FJL7; A3FJM8; A3FJQ0; A3FJR1; A3FJS2; A3FJU4; A3FJV5; A3FJW6; D0U120; Q2LLJ7; Q2LLK8; Q2LLL9; Q2LLN0; Q2LLP1; Q2LLQ2; Q2LLR3; Q2LLS4; Q2LLT5; Q2LLV7; Q2LLZ0; Q2LLU6; Q2LLW8; Q2LLX9; Q2LM01; Q2LM12; Q9G085; B9PBH9
UniRef90_Q85730	Cluster: Src-p60 phoshoprotein (Fragment)	204	7	Rous sarcoma virus; Mesocricetus auratus (Golden hamster); Caiman crocodilus (Spectacled caiman) (Caiman sclerops); Gallus gallus (Chicken); Geochelone elegans (Indian star tortoise); Caretta caretta (Loggerhead sea turtle)	Q85730; Q64532; Q64990; Q60F77; P00523-2; Q60F79; Q60F82
UniRef90_Q8JMG4	Cluster: Structural protein	329	11	Penaeus monodon (Giant tiger prawn); Infectious hypodermal and hematopoietic necrosis virus (IHHNV)	Q8JMG4; A6N9K7; B4YSS4; B6DUE0; D2WXL4; Q67EU0; Q67EU3; Q8JMG6; Q8JXQ4; Q9E2G5; Q9IBP5
UniRef90_Q6UA25	Cluster: Surface glycoprotein (Fragment)	292	6	Gallus gallus (Chicken); Avian leukosis virus (ALV)	Q6UA25; C0KLD2; A6YT10; Q64999; Q6UA26; Q6UA24
UniRef90_Q64142	Cluster: T1 antigen (Fragment)	134	4	Rattus sp.; Simian virus 40 (SV40)	Q64142; Q64141; Q6QQT6; Q6QQT7
UniRef90_P03707	Cluster: Terminase small subunit	181	52	Enterobacteria phage lambda (Bacteriophage lambda); Xenopus tropicalis (Western clawed frog) (Silurana tropicalis); Enterobacteria phage DE3; Escherichia coli B7A; Escherichia coli E22; Escherichia coli B171; Escherichia coli (strain 55989 / EAEC); Escherichia coli (strain K12 / MC4100 / BW2952); Escherichia coli (strain B / BL21-DE3); Escherichia coli O103:H2 (strain 12009 / EHEC); Escherichia c…	P03707; UPI00006A1DC0; C6ZCX6; B3HCA8; B3I4J0; B3WMG5; B7LBB5; C5A103; C6EJF4; C8U2P6; P31061; B1XF16; C9QVS1; P31062; B1XGF7; C4ZV07; C9R1G3; C2ET31; A7ZJH7; B1EP48; D3GSK3; B5YXF7; B2NUN0; B2P6X0; B2PPC5; B3A9F9; B3AU16; B3B470; B3BII3; B3BZ28; B6ZZF9; C6URV8; Q8X5E7; B1IR46; B3IGC9; D5CWA9; B6I0L3; B7M6H4; B7NUT9; C8TMC8; B6IBL1; B3XA83; B7LZT1; B7N9C6; Q3YZJ0; UPI0001CF5910; D3QKR0; B7N3T1; U…
UniRef90_Q789F3	Cluster: Transcription factor Maf	359	3	Gallus gallus (Chicken); Avian musculoaponeurotic fibrosarcoma virus AS42	Q789F3; Q789F3-2; P23091
UniRef90_P01104	Cluster: Transforming protein Myb	382	3	Avian myeloblastosis virus; Gallus gallus (Chicken)	P01104; Q90787; UPI0000ECCB63
UniRef90_P01115	Cluster: Transforming protein p21	241	5	Harvey murine sarcoma virus; Rattus norvegicus (Rat); Mus musculus (Mouse)	P01115; Q4KLL6; Q5RJJ8; UPI0000500986; Q6P716
UniRef90_P10404	Cluster: Transmembrane protein	641	23	Mus musculus (Mouse); Xenotropic MuLV-related virus (isolate VP35) (XMRV); Xenotropic MuLV-related virus (isolate VP42) (XMRV); Xenotropic MuLV-related virus; Xenotropic MuLV-related virus (isolate VP62) (XMRV); Murine leukemia virus CasE#1; Mus musculus castaneus (Southeastern Asian house mouse); Murine leukemia virus; Xenotropic murine leukemia virus; Murine type C retrovirus; DG-75 Murine leuk…	P10404; Q2F7J1; Q2F7I8; D0UFB0; Q27ID8; Q811M8; A7XZ48; D0UFA5; D0UFA8; Q505R5; Q80SV3; Q03875; Q85510; Q85735; Q99043; Q9DQ22; Q9E7M0; Q9WLJ4; Q6WP47; B9VGS7; B9VGS9; C9DHW5; B0FLN0
UniRef90_P31621	Cluster: Transmembrane protein	615	10	Sheep pulmonary adenomatosis virus (Jaagsiekte sheep retrovirus) (JSRV); Ovis aries (Sheep)	P31621; Q9WJR2; Q9YJ35; Q90RI3; Q9YNA0; Q9YN97; A9LHI7; Q9N1R7; Q09PK8; A9LHQ3
UniRef90_P31789	Cluster: Transmembrane protein	584	3	Mouse intracisternal a-particle MIAE (IAP-MIAE); Mus musculus (Mouse)	P31789; UPI0000D65A21; UPI0000D65A57
UniRef90_P0C5W5	Cluster: Transposase insD for insertion element IS2A/D/F/H/I/K	301	224	Escherichia coli; Escherichia coli (strain K12); Escherichia coli 53638; Escherichia coli B7A; Shigella dysenteriae 1012; Proteus vulgaris; Shigella flexneri 5a; Salmonella typhi; Escherichia coli O139:H28 (strain E24377A / ETEC); Escherichia coli (strain K12 / DH10B); Shigella boydii serotype 18 (strain CDC 3083-94 / BS512); Escherichia coli (strain K12 / MC4100 / BW2952); Escherichia coli (stra…	P0C5W5; P0CF53; P0CF54; P0CF55; P0CF56; P0CF57; P0CF58; P0CF59; B2N5Z0; B3H9Q9; B3WVB6; Q2VP36; Q7A226; Q7BEK3; Q7BLC1; A7ZGY0; B1X6T3; B2TU15; C4ZQQ8; C6UK21; C9QQR7; D2AAW0; P0CF62; P0CF63; P0CF64; P0CF61; A7ZGR2; UPI0001610A47; Q9ZXG3; A5A6F3; D2A6T0; Q7CE70; B1VC69; B3X2J0; B2N0V3; B2N5H7; B1LFB2; B2N950; B5YWQ0; B2NUT1; B2P6S2; B2PP73; B3A9C3; B3AVG1; B3B411; B3BIC9; B6ZZM0; C6URC7; Q8X786; …
UniRef90_Q80SV2	Cluster: Truncated envelope polyprotein	438	11	Mus musculus (Mouse); Friend mink cell focus-inducing virus; Murine leukemia virus; Mink cell focus-forming virus	Q80SV2; Q96800; Q8J9D4; Q86891; Q3HS36; Q86892; Q5MNL6; Q5MNN8; Q5MNP0; Q85561; Q5MNK0
UniRef90_Q09N05	Cluster: Truncated envelope protein B (Fragment)	46	2	Sus scrofa (Pig); Porcine endogenous retrovirus	Q09N05; Q9IUF4
UniRef90_P00530	Cluster: Tyrosine-protein kinase transforming protein Fps	873	2	Fujinami sarcoma virus; Gallus gallus (Chicken)	P00530; Q90778
UniRef90_P04048	Cluster: Tyrosine-protein kinase transforming protein kit	370	4	Feline sarcoma virus (strain Hardy-Zuckerman 4); Lama guanicoe pacos (Alpaca) (Lama pacos); Rattus norvegicus (Rat)	P04048; Q0ZHH7; Q9EQ22; Q9EQ24
UniRef90_Q8SWD4	Cluster: Ubiquitin	77	82	Encephalitozoon cuniculi (Microsporidian parasite); Sorghum bicolor (Sorghum) (Sorghum vulgare); Oryza sativa subsp. indica (Rice); Triticum aestivum (Wheat); Drosophila persimilis (Fruit fly); Drosophila yakuba (Fruit fly); Oncorhynchus tschawytscha (Chinook salmon) (King salmon); Ailuropoda melanoleuca (Giant panda); Glycine max (Soybean) (Glycine hispida); Nicotiana plumbaginifolia (Leadwort-l…	Q8SWD4; C5X992; B8AYV2; A6N0Z3; Q41570; Q4JHU8; B4IS91; B4PH73; C3VPX7; D2GW09; C5Z4A8; C6TGK5; O24122; Q0MW36; Q2XTF0; A0T498; Q41503; C5MHT0; Q25426; Q5XXB7; Q9BH19; P93379; Q7DLP0; Q7DLN9; A0T497; Q9SAT2; A7K8G3; C0H775; C1BYH2; UPI0000EBDB3B; UPI0001CE0C53; P42739; P08618; P23324; O46543; P08565; Q9P3Z3; B0B031; B0B032; B0B038; B0B033; B0B036; B0B037; B0B069; B4YB14; D2KP20; Q17001; Q24575; Q…
UniRef90_Q62573	Cluster: Unidentified reading frame	315	5	Mus musculus (Mouse); Endogenous mouse mammary tumor virus Mtv1	Q62573; Q64286; Q64354; Q9IZT9; Q9R052
UniRef90_Q06832	Cluster: Vbeta2 deleting element	315	8	Mus musculus (Mouse); Mouse mammary tumor virus (MMTV)	Q06832; Q61911; Q62473; Q62475; Q0PUY8; Q83400; Q83411; Q9WHV8
UniRef90_B7S8Z1	Cluster: Viral ankyrin	157	2	Glyptapanteles indiensis; Glyptapanteles indiensis bracovirus	B7S8Z1; Q2THU8
UniRef90_P0C6Z6	Cluster: Viral interleukin-10 homolog	170	4	Epstein-Barr virus (strain AG876) (HHV-4) (Human herpesvirus 4); Epstein-Barr virus (strain B95-8) (HHV-4) (Human herpesvirus 4); Epstein-Barr virus (strain GD1) (HHV-4) (Human herpesvirus 4); Gorilla gorilla (Western Gorilla)	P0C6Z6; P03180; P0CAP9; A1YEU1
UniRef90_Q07220	Cluster: Virus 1 (ScV1) internal inverted repeat (Fragment)	23	2	Saccharomyces cerevisiae (Baker's yeast); Saccharomyces cerevisiae virus L-A (ScV-L-A) (ScVL1)	Q07220; Q89233
UniRef90_Q07222	Cluster: Virus 1 (ScV1) internal inverted repeat (Fragment)	72	2	Saccharomyces cerevisiae (Baker's yeast); Saccharomyces cerevisiae virus L-A (ScV-L-A) (ScVL1)	Q07222; Q89234
UniRef90_Q06699	Cluster: Yeast (S.cerevisiae, strain T132B-NK-3 L-A) coat protein (Fragment)	27	2	Saccharomyces cerevisiae (Baker's yeast); Saccharomyces cerevisiae virus L-A (ScV-L-A) (ScVL1)	Q06699; A8B735
