# Supplementary material for: Viral Proteins Acquired from a Host Converge to Simplified Domain Architectures
Source: PLoS Comput Biol. 2012 Feb 2;8(2):e1002364. doi: 10.1371/journal.pcbi.1002364 (PMC3271019; doi:10.1371/journal.pcbi.1002364)
Supplement: Table S3 — Collection and properties of the 667 Pfam families of the cross-taxa of metazoa and viruses. (XLSX) [file pcbi.1002364.s007.xlsx]

## Sheet: Sheet1
Suppelemtary Table S3
668 Pfam entries virus-metazoa cross-taxon
ID	NAME	#METAZOA_PROTS	AVG_METAZOA_PROT_LENGTHS	AVG_METAZOA_DOMAIN_NUM	AVG_METAZOA_DISTINCT_DOMAIN_NUM	#VIRUSES_PROTS	AVG_VIRUS_PROT_LENGTHS	AVG_VIR_DOMAIN_NUM	AVG_VIR_DISTINCT_DOMAIN_NUM	#BACTERIA_OR_FUNGI_PROTS	#METAZOA_VIRUSES	family size	% of viral/ family	% of viral/ metazoan proteins	% of viral/ viral+metazoan proteins
HALZ	Homeobox associated leucine zipper	4	335	1	1	1	103	1	1	2	0	7	14.2857	25	20
PC4	Transcriptional Coactivator p15 (PC4)	62	123.452	1	1	1	102	1	1	65	0	128	0.78125	1.6129	1.5873
Archease	Archease protein family (DUF101/UPF0211)	43	153.116	1	1	1	143	1	1	76	0	120	0.833333	2.32558	2.27273
Sds3	Sds3-like	91	285.165	1	1	1	938	1	1	117	0	209	0.478469	1.0989	1.08696
Heme_oxygenase	Heme oxygenase	76	258.184	1	1	1	233	1	1	334	0	411	0.243309	1.31579	1.2987
OCD_Mu_crystall	Ornithine cyclodeaminase/mu-crystallin family	38	314.789	1	1	1	91	1	1	953	0	992	0.100806	2.63158	2.5641
Abhydrolase_2	Phospholipase/Carboxylesterase	107	226.421	1	1	1	312	1	1	1307	0	1415	0.0706714	0.934579	0.925926
DHQ_synthase	3-dehydroquinate synthase	4	283.25	1	1	1	338	1	1	1632	0	1637	0.0610874	25	20
Glyco_transf_17	Glycosyltransferase family 17	32	490.531	1	1	2	270	1	1	27	0	61	3.27869	6.25	5.88235
DUF3472	Domain of unknown function (DUF3472)	9	298.556	1	1	2	245	1	1	91	0	102	1.96078	22.2222	18.1818
Acetyltransf_2	N-acetyltransferase	96	277.417	1	1	2	208	1	1	611	0	709	0.282087	2.08333	2.04082
DegT_DnrJ_EryC1	DegT/DnrJ/EryC1/StrS aminotransferase family	3	429	1	1	2	365.5	1	1	2941	0	2946	0.0678887	66.6667	40
IL17	Interleukin-17	78	163.385	1	1	3	151	1	1	0	0	81	3.7037	3.84615	3.7037
Chloroa_b-bind	Chlorophyll A-B binding protein	4	111.75	1	1	3	36.667	1	1	297	0	304	0.986842	75	42.8571
TauE	Sulfite exporter TauE/SafE	11	319.182	1	1	3	252	1	1	4385	0	4399	0.0681973	27.2727	21.4286
PTPS	6-pyruvoyl tetrahydropterin synthase	42	151.857	1	1	4	186.75	1	1	1185	0	1231	0.324939	9.52381	8.69565
PRP1_N	PRP1 splicing factor, N-terminal	42	853.262	1	1	5	77.8	1	1	59	0	106	4.71698	11.9048	10.6383
Nuc_deoxyrib_tr	Nucleoside 2-deoxyribosyltransferase	10	148.4	1	1	5	154.8	1	1	388	0	403	1.24069	50	33.3333
PAD_porph	Porphyromonas-type peptidyl-arginine deiminase	3	357	1	1	5	360.4	1	1	630	0	638	0.783699	166.667	62.5
GTP_cyclohydroI	GTP cyclohydrolase I	51	244.314	1	1	5	229	1	1	2271	0	2327	0.214869	9.80392	8.92857
Mpv17_PMP22	Mpv17 / PMP22 family	236	196.182	1	1	6	165.333	1	1	250	0	492	1.21951	2.54237	2.47934
IL6	Interleukin-6/G-CSF/MGF family	126	183.183	1	1	10	205.9	1	1	0	0	136	7.35294	7.93651	7.35294
NT5C	5' nucleotidase, deoxy (Pyrimidine), cytosolic type C protein (NT5C)	12	211.417	1	1	12	199.583	1	1	171	0	195	6.15385	100	50
MazG	MazG nucleotide pyrophosphohydrolase domain	17	150.176	1	1	15	122.867	1	1	1794	0	1826	0.821468	88.2353	46.875
BC10	Bladder cancer-related protein BC10	43	86.279	1	1	17	86.353	1	1	31	0	91	18.6813	39.5349	28.3333
CbiA	CobQ/CobB/MinD/ParA nucleotide binding domain	4	186.25	1	1	17	281.059	1	1	10222	0	10243	0.165967	425	80.9524
Borrelia_orfX	Orf-X protein	19	158.105	1	1	18	166.611	1	1	0	0	37	48.6486	94.7368	48.6486
Cpn10	Chaperonin 10 Kd subunit	95	91.811	1	1	18	110.611	1	1	2001	0	2114	0.851466	18.9474	15.9292
Salp15	Salivary protein of 15kDa inhibits CD4+ T cell activation	63	127.667	1	1	21	157	1	1	0	0	84	25	33.3333	25
DUF3168	Protein of unknown function (DUF3168)	6	120.833	1	1	27	120.889	1	1	118	0	151	17.8808	450	81.8182
VRR_NUC	VRR-NUC domain	10	864.9	1	1	46	123.565	1	1	394	0	450	10.2222	460	82.1429
RIP	Ribosome inactivating protein	3	459.333	1	1	47	317.894	1	1	173	0	223	21.0762	1566.67	94
IL10	Interleukin 10	131	143.969	1	1	63	158	1	1	0	0	194	32.4742	48.0916	32.4742
SSB	Single-strand binding protein family	54	149.426	1	1	72	147.472	1	1	3026	0	3152	2.28426	133.333	57.1429
AIG2	AIG2-like family	61	164.607	1	1	4	139.25	1	1	805	1	870	0.45977	6.55738	6.15385
Hydrolase_4	Putative lysophospholipase	35	285.257	1	1	25	200.16	1	1	1574	1	1634	1.52999	71.4286	41.6667
MMTV_SAg	Mouse mammary tumour virus superantigen	24	259.5	1	1	63	236.302	1	1	0	1	87	72.4138	262.5	72.4138
Late_protein_L1	L1 (late) protein	3	247	1	1	2219	182.898	1	1	0	1	2222	99.865	73966.7	99.865
Profilin	Profilin	110	131.673	1	1	25	132.84	1	1	63	2	198	12.6263	22.7273	18.5185
Tenui_N	Tenuivirus/Phlebovirus nucleocapsid protein	5	189.8	1	1	228	260.439	1	1	0	3	233	97.8541	4560	97.8541
Pox_A32	Poxvirus A32 protein	10	314.1	1	1	91	277.231	1	1	2	6	103	88.3495	910	90.099
Ferritin	Ferritin-like domain	485	180.377	1.002	1	2	171	1	1	2978	0	3465	0.0577201	0.412371	0.410678
NGF	Nerve growth factor family	1668	209.826	1.002	1.001	6	170.667	1	1	0	2	1674	0.358423	0.359712	0.358423
zf-Tim10_DDP	Tim10/DDP family zinc finger	253	100.091	1.004	1.004	1	352	1	1	229	0	483	0.207039	0.395257	0.393701
PNP_UDP_1	Phosphorylase superfamily	238	306.244	1.004	1	3	272.333	1	1	4706	0	4947	0.0606428	1.2605	1.24481
SIR2	Sir2 family	274	403.828	1.004	1.004	5	251.8	1	1	1482	0	1761	0.28393	1.82482	1.79211
LACT	Lecithin:cholesterol acyltransferase	204	263.01	1.005	1	2	378	1	1	158	0	364	0.549451	0.980392	0.970874
CBFD_NFYB_HMF	Histone-like transcription factor (CBF/NF-Y) and archaeal histone	315	209.46	1.006	1.006	1	176	1	1	370	0	686	0.145773	0.31746	0.316456
Glyco_transf_11	Glycosyl transferase family 11	151	340.503	1.007	1.007	1	264	1	1	132	0	284	0.352113	0.662252	0.657895
ABC1	ABC1 family	120	535.983	1.008	1.008	7	455.571	1	1	1628	0	1755	0.39886	5.83333	5.51181
Lipase_3	Lipase (class 3)	116	518.052	1.009	1.009	8	272.5	1	1	856	1	980	0.816327	6.89655	6.45161
GSHPx	Glutathione peroxidase	303	173.62	1.01	1.01	4	204.5	1	1	1145	2	1452	0.275482	1.32013	1.30293
TFIID-18kDa	Transcription initiation factor IID, 18kD subunit	89	226.573	1.011	1.011	2	64	1	1	117	0	208	0.961538	2.24719	2.1978
Pyridoxal_deC	Pyridoxal-dependent decarboxylase conserved domain	1403	350.853	1.011	1.001	6	364.167	1	1	1478	0	2887	0.207828	0.427655	0.425834
SprT-like	SprT-like family	88	618.33	1.011	1.011	21	172.048	1	1	679	0	788	2.66497	23.8636	19.2661
3Beta_HSD	3-beta hydroxysteroid dehydrogenase/isomerase family	177	332.537	1.011	1	68	256.015	1	1	380	5	625	10.88	38.4181	27.7551
MIP	Major intrinsic protein	556	258.897	1.013	1.005	2	270	1	1	1925	0	2483	0.0805477	0.359712	0.358423
Transaldolase	Transaldolase	61	281.049	1.016	1.016	5	221	1	1	1999	0	2065	0.242131	8.19672	7.57576
CBAH	Linear amide C-N hydrolases, choloylglycine hydrolase family	60	334.083	1.017	1	6	278.833	1	1	641	0	707	0.848656	10	9.09091
HSP70	Hsp70 protein	1524	481.572	1.017	1.005	296	304.307	1	1	4866	0	6686	4.42716	19.4226	16.2637
dNK	Deoxynucleoside kinase	181	281.436	1.017	1.017	39	214.462	1	1	621	4	841	4.63734	21.547	17.7273
Phospholip_A2_1	Phospholipase A2	832	145.596	1.019	1.005	1	191	1	1	32	0	865	0.115607	0.120192	0.120048
Pro_dh	Proline dehydrogenase	54	491.259	1.019	1	1	253	1	1	1011	0	1066	0.0938086	1.85185	1.81818
SHMT	Serine hydroxymethyltransferase	94	429.202	1.021	1	3	405.667	1	1	1810	0	1907	0.157315	3.19149	3.09278
CYTH	CYTH domain	47	200.957	1.021	1.021	4	195.25	1	1	1107	0	1158	0.345423	8.51064	7.84314
Glyco_transf_6	Glycosyltransferase family 6	314	241.761	1.022	1.006	1	231	1	1	11	0	326	0.306748	0.318471	0.31746
Iso_dh	Isocitrate/isopropylmalate dehydrogenase	418	345.866	1.022	1.017	1	54	1	1	3503	0	3922	0.0254972	0.239234	0.238663
Phosphorylase	Carbohydrate phosphorylase	129	717.915	1.023	1.023	2	102.5	1	1	1284	0	1415	0.141343	1.55039	1.52672
DNA_primase_lrg	Eukaryotic and archaeal DNA primase, large subunit	43	481.837	1.023	1	1	225	1	1	61	1	105	0.952381	2.32558	2.27273
PIG-L	GlcNAc-PI de-N-acetylase	41	286.171	1.024	1	1	225	1	1	1327	0	1369	0.073046	2.43902	2.38095
TspO_MBR	TspO/MBR family	84	160.667	1.024	1	4	163.25	1	1	427	2	515	0.776699	4.7619	4.54545
EI24	Etoposide-induced protein 2.4 (EI24)	40	364.65	1.025	1	1	262	1	1	7	0	48	2.08333	2.5	2.43902
UPF0005	Uncharacterised protein family UPF0005	324	275.321	1.025	1.009	31	223.419	1	1	1232	2	1587	1.95337	9.5679	8.73239
Methyltransf_15	RNA cap guanine-N2 methyltransferase	39	548.744	1.026	1.026	1	256	1	1	84	0	124	0.806452	2.5641	2.5
PHO4	Phosphate transporter family	76	549.868	1.026	1	1	534	1	1	1341	0	1418	0.0705219	1.31579	1.2987
Acyl_transf_3	Acyltransferase family	457	675.28	1.026	1.015	8	427.625	1	1	3721	0	4186	0.191113	1.75055	1.72043
Synaptobrevin	Synaptobrevin	328	173.247	1.027	1.021	1	117	1	1	243	0	572	0.174825	0.304878	0.303951
Histone	Core histone H2A/H2B/H3/H4	6932	119.843	1.027	1.025	4	387	1	1	866	0	7802	0.0512689	0.0577034	0.0576701
ELO	GNS1/SUR4 family	544	276.162	1.028	1.002	7	252	1	1	171	2	722	0.969529	1.28676	1.27042
Rhabdo_ncap	Rhabdovirus nucleocapsid protein	36	357.75	1.028	1	5141	199.595	1	1	0	29	5177	99.3046	14280.6	99.3046
DUF159	Uncharacterised ACR, COG2135	35	318.086	1.029	1	6	225.333	1	1	782	0	823	0.72904	17.1429	14.6341
polyprenyl_synt	Polyprenyl synthetase	174	359.052	1.029	1.017	7	318	1	1	3329	0	3510	0.19943	4.02299	3.8674
DUF1308	Protein of unknown function (DUF1308)	33	447.727	1.03	1.03	1	340	1	1	40	0	74	1.35135	3.0303	2.94118
bZIP_2	Basic region leucine zipper	532	305.192	1.03	1.023	3	190.333	1	1	174	0	709	0.423131	0.56391	0.560748
PAP2	PAP2 superfamily	483	318.337	1.031	1.029	13	161.231	1	1	4211	0	4707	0.276184	2.69151	2.62097
Adenylsucc_synt	Adenylosuccinate synthetase	62	421.194	1.032	1	7	427.857	1	1	1499	0	1568	0.446429	11.2903	10.1449
PBP	Phosphatidylethanolamine-binding protein	243	241.267	1.033	1.029	1	143	1	1	1014	0	1258	0.0794913	0.411523	0.409836
IF4E	Eukaryotic initiation factor 4E	267	229.367	1.034	1.019	1	272	1	1	153	0	421	0.23753	0.374532	0.373134
Acyltransferase	Acyltransferase	533	420.229	1.034	1.024	3	342	1	1	4897	0	5433	0.0552181	0.562852	0.559701
Glyco_hydro_16	Glycosyl hydrolases family 16	290	384.248	1.034	1.024	6	336.167	1	1	1044	0	1340	0.447761	2.06897	2.02703
Cupin_4	Cupin superfamily protein	142	435.134	1.035	1.035	2	420	1	1	571	0	715	0.27972	1.40845	1.38889
D123	D123	28	310.643	1.036	1	1	323	1	1	64	0	93	1.07527	3.57143	3.44828
HpcH_HpaI	HpcH/HpaI aldolase/citrate lyase family	28	320.393	1.036	1	1	248	1	1	1977	0	2006	0.0498504	3.57143	3.44828
Innexin	Innexin	330	382.564	1.036	1.003	23	352.783	1	1	0	1	353	6.51558	6.9697	6.51558
PRP38	PRP38 family	80	330.512	1.038	1.038	2	190	1	1	59	0	141	1.41844	2.5	2.43902
PTS_2-RNA	RNA 2'-phosphotransferase, Tpt1 / KptA family	26	237.846	1.038	1.038	3	185	1	1	230	0	259	1.1583	11.5385	10.3448
CD20	CD20-like family	285	295.382	1.039	1.028	2	243	1	1	2	0	289	0.692042	0.701754	0.696864
Srg	Srg family chemoreceptor	125	307.056	1.04	1.024	1	325	1	1	0	0	126	0.793651	0.8	0.793651
UDPGT	UDP-glucoronosyl and UDP-glucosyl transferase	1163	480.804	1.04	1.009	72	485.667	1	1	735	3	1970	3.65482	6.19089	5.82996
Tmemb_185A	Transmembrane Fragile-X-F protein	93	229.753	1.043	1.011	2	80.5	1	1	4	0	99	2.0202	2.15054	2.10526
Pep_deformylase	Polypeptide deformylase	45	215.244	1.044	1	2	137	1	1	2292	0	2339	0.0855066	4.44444	4.25532
Kua-UEV1_localn	Kua-ubiquitin conjugating enzyme hybrid localisation domain	43	272.093	1.047	1.047	1	200	1	1	10	0	54	1.85185	2.32558	2.27273
Rad60-SLD	Ubiquitin-2 like Rad60 SUMO-like	172	170.797	1.047	1.035	2	85	1	1	112	2	286	0.699301	1.16279	1.14943
RmlD_sub_bind	RmlD substrate binding domain	21	321.619	1.048	1.048	1	289	1	1	1496	0	1518	0.0658762	4.7619	4.54545
ERCC4	ERCC4 domain	96	581.354	1.052	1.031	1	179	1	1	192	0	289	0.346021	1.04167	1.03093
PRK	Phosphoribulokinase / Uridine kinase family	116	361.095	1.052	1.034	1	210	1	1	2250	0	2367	0.0422476	0.862069	0.854701
SSF	Sodium:solute symporter family	590	531.397	1.054	1.01	2	507	1	1	3546	0	4138	0.0483325	0.338983	0.337838
Ribosomal_L12	Ribosomal protein L7/L12 C-terminal domain	54	179.185	1.056	1.019	2	146.5	1	1	1569	0	1625	0.123077	3.7037	3.57143
FR47	FR47-like protein	123	287.333	1.057	1.041	1	149	1	1	402	0	526	0.190114	0.813008	0.806452
p450	Cytochrome P450	5440	413.479	1.059	1.009	2	588.5	1	1	6739	0	12181	0.016419	0.0367647	0.0367512
dCMP_cyt_deam_1	Cytidine and deoxycytidylate deaminase zinc-binding region	196	220.143	1.061	1.005	48	155.146	1	1	5177	0	5421	0.885445	24.4898	19.6721
Sulfotransfer_2	Sulfotransferase family	439	344.74	1.062	1.014	1	285	1	1	415	0	855	0.116959	0.22779	0.227273
PhyH	Phytanoyl-CoA dioxygenase (PhyH)	116	317.759	1.069	1.043	1	257	1	1	1133	0	1250	0.08	0.862069	0.854701
Na_sulph_symp	Sodium:sulfate symporter transmembrane region	181	516.762	1.077	1.039	1	424	1	1	1342	0	1524	0.0656168	0.552486	0.549451
Peptidase_C48	Ulp1 protease family, C-terminal catalytic domain	271	504.694	1.077	1.044	12	298.333	1	1	277	0	560	2.14286	4.42804	4.24028
DUF265	Protein of unknown function, DUF265	37	239.324	1.081	1.081	1	443	1	1	52	0	90	1.11111	2.7027	2.63158
zf-LITAF-like	LITAF-like zinc ribbon domain	292	154.774	1.082	1.058	6	90.667	1	1	25	0	323	1.85759	2.05479	2.01342
MTP18	Mitochondrial 18 KDa protein (MTP18)	36	164.806	1.083	1	1	187	1	1	45	0	82	1.21951	2.77778	2.7027
adh_short	short chain dehydrogenase	3225	287.494	1.085	1.07	3	282	1	1	33810	0	37038	0.00809979	0.0930233	0.0929368
Xan_ur_permease	Permease family	100	504.54	1.09	1.02	3	409.667	1	1	4223	0	4326	0.0693481	3	2.91262
PARG_cat	Poly (ADP-ribose) glycohydrolase (PARG)	55	613.418	1.091	1.018	16	527.188	1	1	8	0	79	20.2532	29.0909	22.5352
MTS	Methyltransferase small domain	172	283.099	1.093	1.093	6	654.333	1	1	4343	0	4521	0.132714	3.48837	3.37079
FGE-sulfatase	Formylglycine-generating sulfatase enzyme	74	330.486	1.095	1.014	3	310.667	1	1	1688	0	1765	0.169972	4.05405	3.8961
G_glu_transpept	Gamma-glutamyltranspeptidase	230	491.104	1.096	1.035	1	438	1	1	1551	0	1782	0.0561167	0.434783	0.4329
Glyco_transf_29	Glycosyltransferase family 29 (sialyltransferase)	733	352.443	1.1	1.046	8	306	1	1	28	0	769	1.04031	1.09141	1.07962
7tm_1	7 transmembrane receptor (rhodopsin family)	22910	293.432	1.106	1.083	225	355.631	1	1	4	4	23139	0.972384	0.982104	0.972552
MCM	MCM2/3/5 family	407	682.951	1.108	1.093	1	704	1	1	394	0	802	0.124688	0.2457	0.245098
PNK3P	Polynucleotide kinase 3 phosphatase	37	489.135	1.108	1.108	19	317.421	1	1	558	0	614	3.09446	51.3514	33.9286
7TM_GPCR_Srv	Serpentine type 7TM GPCR chemoreceptor Srv	64	333.531	1.109	1.016	1	954	1	1	0	0	65	1.53846	1.5625	1.53846
PLAC8	PLAC8 family	73	177.014	1.11	1.082	1	122	1	1	69	0	143	0.699301	1.36986	1.35135
MFS_1	Major Facilitator Superfamily	2909	501.055	1.11	1.042	2	526.5	1	1	47388	0	50299	0.00397622	0.0687521	0.0687049
H_lectin	H-type lectin domain	35	293.257	1.114	1.086	1	272	1	1	72	0	108	0.925926	2.85714	2.77778
COesterase	Carboxylesterase	2085	520.66	1.115	1.044	4	631	1	1	1140	0	3229	0.123877	0.191847	0.191479
Aa_trans	Transmembrane amino acid transporter protein	610	452.744	1.12	1.01	6	378.667	1	1	595	0	1211	0.495458	0.983607	0.974026
Glyco_transf_8	Glycosyl transferase family 8	251	507.924	1.12	1.112	36	269.972	1	1	970	3	1257	2.86396	14.3426	12.5436
DUF258	Protein of unknown function, DUF258	8	185.625	1.125	1.125	1	74	1	1	1549	0	1558	0.0641849	12.5	11.1111
Rhomboid	Rhomboid family	246	468.549	1.126	1.114	1	171	1	1	2023	0	2270	0.0440529	0.406504	0.404858
Nucleoside_tran	Nucleoside transporter	149	447.893	1.128	1.013	2	502.5	1	1	55	0	206	0.970874	1.34228	1.3245
PfkB	pfkB family carbohydrate kinase	270	342.867	1.13	1.081	1	252	1	1	7308	0	7579	0.0131944	0.37037	0.369004
MCLC	Mid-1-related chloride channel (MCLC)	15	449.333	1.133	1	1	316	1	1	0	0	16	6.25	6.66667	6.25
Sulfotransfer_1	Sulfotransferase domain	906	364.141	1.136	1.094	1	304	1	1	955	0	1862	0.0537057	0.110375	0.110254
SUI1	Translation initiation factor SUI1	195	225.272	1.138	1.128	1	106	1	1	579	0	775	0.129032	0.512821	0.510204
DUF833	Protein of unknown function (DUF833)	50	256.44	1.14	1	2	274	1	1	284	2	336	0.595238	4	3.84615
Cpn60_TCP1	TCP-1/cpn60 chaperonin family	867	475.721	1.143	1.081	1	558	1	1	10248	0	11116	0.00899604	0.11534	0.115207
AOX	Alternative oxidase	7	170.714	1.143	1	2	136	1	1	141	0	150	1.33333	28.5714	22.2222
Acetyltransf_1	Acetyltransferase (GNAT) family	962	267.081	1.154	1.143	24	162.375	1	1	32317	0	33303	0.0720656	2.4948	2.43408
FA_hydroxylase	Fatty acid hydroxylase superfamily	173	314.277	1.156	1.15	3	286.667	1	1	1438	0	1614	0.185874	1.7341	1.70455
SCP-1	Synaptonemal complex protein 1 (SCP-1)	12	709.333	1.167	1	2	262	1	1	0	0	14	14.2857	16.6667	14.2857
Rad52_Rad22	Rad52/22 family double-strand break repair protein	36	311.083	1.167	1.139	12	235.167	1	1	134	0	182	6.59341	33.3333	25
HD	HD domain	100	332.76	1.17	1.17	5	274.6	1	1	10715	0	10820	0.0462107	5	4.7619
Lipase	Lipase	975	366.315	1.17	1.158	8	589.5	1	1	4	1	987	0.810537	0.820513	0.813835
Carb_anhydrase	Eukaryotic-type carbonic anhydrase	641	330.758	1.173	1.092	39	303.026	1	1	246	2	926	4.21166	6.08424	5.73529
Fork_head	Fork head domain	1501	394.718	1.175	1.168	2	391	1	1	229	1	1732	0.115473	0.133245	0.133067
DUF672	Protein of unknown function (DUF672)	17	307.294	1.176	1.059	1	646	1	1	7	0	25	4	5.88235	5.55556
Sod_Cu	Copper/zinc superoxide dismutase (SODC)	430	231.535	1.177	1.07	97	144.763	1	1	863	6	1390	6.97842	22.5581	18.4061
Asp_Arg_Hydrox	Aspartyl/Asparaginyl beta-hydroxylase	73	509.452	1.178	1.151	3	218.333	1	1	350	0	426	0.704225	4.10959	3.94737
DUF836	Glutaredoxin-like domain (DUF836)	21	299.714	1.19	1.19	42	125.548	1	1	504	5	567	7.40741	200	66.6667
7TM_GPCR_Srw	Serpentine type 7TM GPCR chemoreceptor Srw	376	381.051	1.191	1.032	1	113	1	1	0	0	377	0.265252	0.265957	0.265252
CN_hydrolase	Carbon-nitrogen hydrolase	303	422.815	1.191	1.188	6	297.5	1	1	4776	0	5085	0.117994	1.9802	1.94175
HIT	HIT domain	132	198.818	1.205	1.197	6	219.167	1	1	2464	0	2602	0.230592	4.54545	4.34783
ETX_MTX2	Clostridium epsilon toxin ETX/Bacillus mosquitocidal toxin MTX2	40	315.825	1.25	1.175	1	286	1	1	72	0	113	0.884956	2.5	2.43902
ATG27	Autophagy-related protein 27	4	413	1.25	1.25	1	90	1	1	66	1	71	1.40845	25	20
Amino_oxidase	Flavin containing amine oxidoreductase	436	485.583	1.257	1.154	3	456.667	1	1	3227	0	3666	0.0818331	0.688073	0.683371
Methyltransf_11	Methyltransferase domain	541	362.305	1.262	1.237	9	203.222	1	1	14906	2	15456	0.0582298	1.66359	1.63636
Cystatin	Cystatin domain	474	212.39	1.264	1.08	44	95.818	1	1	30	0	548	8.0292	9.2827	8.49421
Bcl-2	Apoptosis regulator proteins, Bcl-2 family	311	220.614	1.267	1.244	42	184.262	1	1	0	3	353	11.898	13.5048	11.898
ERG4_ERG24	Ergosterol biosynthesis ERG4/ERG24 family	78	480	1.269	1.154	1	447	1	1	285	0	364	0.274725	1.28205	1.26582
AA_permease	Amino acid permease	820	666.848	1.273	1.144	1	419	1	1	11008	0	11829	0.0084538	0.121951	0.121803
Chitin_synth_2	Chitin synthase	153	1012.88	1.275	1.255	12	534.167	1	1	838	0	1003	1.19641	7.84314	7.27273
Glyoxalase	Glyoxalase/Bleomycin resistance protein/Dioxygenase superfamily	145	270.255	1.276	1.028	3	123.667	1	1	10879	0	11027	0.0272059	2.06897	2.02703
Pribosyltran	Phosphoribosyl transferase domain	363	311.094	1.284	1.27	6	279.333	1	1	12522	0	12891	0.0465441	1.65289	1.62602
DNA_binding_1	6-O-methylguanine DNA methyltransferase, DNA binding domain	35	179.4	1.286	1.286	1	149	1	1	2428	0	2464	0.0405844	2.85714	2.77778
Retrotrans_gag	Retrotransposon gag protein	105	529.686	1.295	1.286	1	410	1	1	175	0	281	0.355872	0.952381	0.943396
Aminotran_5	Aminotransferase class-V	278	439.158	1.299	1.227	8	389.625	1	1	7587	0	7873	0.101613	2.8777	2.7972
DPBB_1	Rare lipoprotein A (RlpA)-like double-psi beta-barrel	10	191.3	1.3	1.3	1	120	1	1	1091	0	1102	0.0907441	10	9.09091
DUF821	Arabidopsis thaliana protein of unknown function (DUF821)	73	409.452	1.315	1.301	12	980.083	1	1	256	2	341	3.51906	16.4384	14.1176
Endothelin	Endothelin family	63	173.714	1.317	1	2	69	1	1	0	0	65	3.07692	3.1746	3.07692
HSP20	Hsp20/alpha crystallin family	911	168.114	1.333	1.302	4	149.25	1	1	2431	0	3346	0.119546	0.439078	0.437158
FtsK_SpoIIIE	FtsK/SpoIIIE family	3	408.667	1.333	1.333	10	440.7	1	1	2563	0	2576	0.388199	333.333	76.9231
Lipocalin_2	Lipocalin-like domain	73	259.849	1.342	1.055	2	185.5	1	1	516	0	591	0.338409	2.73973	2.66667
NDK	Nucleoside diphosphate kinase	326	238.991	1.344	1.147	1	137	1	1	1322	0	1649	0.0606428	0.306748	0.30581
Homeobox	Homeobox domain	9806	289.419	1.345	1.269	1	224	1	1	403	0	10210	0.00979432	0.0101978	0.0101968
CIDE-N	CIDE-N domain	137	311.102	1.358	1.358	5	129.8	1	1	0	1	142	3.52113	3.64964	3.52113
PGAM	Phosphoglycerate mutase family	428	351.077	1.364	1.362	3	391.333	1	1	6438	0	6869	0.0436745	0.700935	0.696056
Pro_isomerase	Cyclophilin type peptidyl-prolyl cis-trans isomerase/CLD	898	314.208	1.386	1.273	1	234	1	1	2977	0	3876	0.0257998	0.111359	0.111235
RF-1	RF-1 domain	121	256.562	1.388	1.38	7	114.857	1	1	3580	0	3708	0.188781	5.78512	5.46875
PALP	Pyridoxal-phosphate dependent enzyme	198	421.051	1.399	1.348	2	294.5	1	1	10012	0	10212	0.0195848	1.0101	1
Meth_synt_2	Cobalamin-independent synthase, Catalytic domain	5	294.6	1.4	1	1	101	1	1	1301	0	1307	0.0765111	20	16.6667
PAPS_reduct	Phosphoadenosine phosphosulfate reductase family	47	344.277	1.404	1.383	13	303.462	1	1	2141	0	2201	0.590641	27.6596	21.6667
Polyketide_cyc2	Polyketide cyclase / dehydrase and lipid transport	7	343.429	1.429	1.286	2	146	1	1	1713	0	1722	0.116144	28.5714	22.2222
GDPD	Glycerophosphoryl diester phosphodiesterase family	181	516.646	1.431	1.409	6	432.833	1	1	2904	0	3091	0.194112	3.31492	3.20856
Proteasome	Proteasome subunit	1450	237.748	1.447	1.446	1	192	1	1	2050	0	3501	0.0285633	0.0689655	0.068918
IL1	Interleukin-1 / 18	272	218.676	1.456	1.456	2	164.5	1	1	0	0	274	0.729927	0.735294	0.729927
TRAM_LAG1_CLN8	TLC domain	315	328.4	1.46	1.444	14	168.643	1	1	207	0	536	2.61194	4.44444	4.25532
UPAR_LY6	u-PAR/Ly-6 domain	318	175.11	1.475	1.299	2	118.5	1	1	0	0	320	0.625	0.628931	0.625
Peptidase_C14	Caspase domain	618	367.49	1.49	1.322	1	231	1	1	763	0	1382	0.0723589	0.161812	0.161551
Trypsin	Trypsin	8390	341.018	1.497	1.292	16	314.625	1	1	4545	0	12951	0.123543	0.190703	0.19034
Peptidase_S15	X-Pro dipeptidyl-peptidase (S15 family)	6	301	1.5	1.5	1	257	1	1	1491	0	1498	0.0667557	16.6667	14.2857
zf-BED	BED zinc finger	187	418.578	1.503	1.257	1	974	1	1	34	0	222	0.45045	0.534759	0.531915
Branch	Core-2/I-Branching enzyme	183	559.689	1.519	1.508	7	434.286	1	1	123	0	313	2.23642	3.82514	3.68421
Mov34	Mov34/MPN/PAD-1 family	471	474.803	1.535	1.524	7	148.429	1	1	499	0	977	0.716479	1.4862	1.46444
ENTH	ENTH domain	143	576.42	1.538	1.294	1	252	1	1	151	1	295	0.338983	0.699301	0.694444
PP2C	Protein phosphatase 2C	531	481.879	1.542	1.25	6	246.833	1	1	1335	1	1872	0.320513	1.12994	1.11732
MADF_DNA_bdg	Alcohol dehydrogenase transcription factor Myb/SANT-like	866	483.763	1.565	1.279	1	184	1	1	0	1	867	0.11534	0.115473	0.11534
AT_hook	AT hook motif	53	243.585	1.566	1.226	4	129	1	1	90	0	147	2.72109	7.54717	7.01754
SMC_N	RecF/RecN/SMC N terminal domain	322	903.888	1.568	1.528	8	621.625	1	1	4013	1	4343	0.184204	2.48447	2.42424
Morph_protein1	Defects in morphology protein 1, mitochondrial precursor	7	331.429	1.571	1	1	310	1	1	59	0	67	1.49254	14.2857	12.5
PFK	Phosphofructokinase	148	513.865	1.574	1	1	282	1	1	1572	0	1721	0.0581058	0.675676	0.671141
CRAL_TRIO	CRAL/TRIO domain	962	381.551	1.584	1.565	1	215	1	1	352	0	1315	0.0760456	0.10395	0.103842
Evr1_Alr	Erv1 / Alr family	123	461.358	1.602	1.593	40	142.05	1	1	114	2	277	14.4404	32.5203	24.5399
Thioredoxin	Thioredoxin	1311	383.519	1.609	1.192	39	130.385	1	1	5790	2	7140	0.546218	2.97483	2.88889
Methyltransf_12	Methyltransferase domain	164	501.445	1.628	1.628	1	237	1	1	2507	0	2672	0.0374251	0.609756	0.606061
UCH	Ubiquitin carboxyl-terminal hydrolase	1241	855.957	1.633	1.522	9	319.222	1	1	995	0	2245	0.400891	0.725222	0.72
DUF814	Domain of unknown function (DUF814)	89	465.506	1.64	1.64	6	113	1	1	705	0	800	0.75	6.74157	6.31579
Saccharop_dh	Saccharopine dehydrogenase	100	565.48	1.66	1.65	7	504.429	1	1	1236	0	1343	0.521221	7	6.54206
PQ-loop	PQ loop repeat	219	293.224	1.662	1.018	1	97	1	1	617	0	837	0.119474	0.456621	0.454545
TGF_beta	Transforming growth factor beta like domain	1382	334.005	1.684	1.672	8	293.25	1	1	0	2	1390	0.57554	0.578871	0.57554
TLD	TLD	240	504.158	1.688	1.596	1	192	1	1	115	0	356	0.280899	0.416667	0.414938
Glycos_transf_1	Glycosyl transferases group 1	238	612.857	1.689	1.496	35	328.543	1	1	15113	0	15386	0.22748	14.7059	12.8205
Cupin_2	Cupin domain	10	415.1	1.7	1.6	6	171.667	1	1	7276	0	7292	0.082282	60	37.5
Lactamase_B	Metallo-beta-lactamase superfamily	394	451.515	1.708	1.683	9	403.556	1	1	14308	0	14711	0.0611787	2.28426	2.23325
CSD	'Cold-shock' DNA-binding domain	278	340.993	1.716	1.083	1	66	1	1	4423	0	4702	0.0212675	0.359712	0.358423
RHD	Rel homology domain (RHD)	466	627.006	1.721	1.47	1	503	1	1	0	1	467	0.214133	0.214592	0.214133
Abhydrolase_3	alpha/beta hydrolase fold	186	468.661	1.726	1.28	2	306	1	1	4020	0	4208	0.0475285	1.07527	1.06383
PAM2	Ataxin-2 C-terminal region	187	475.652	1.738	1.695	1	438	1	1	3	0	191	0.52356	0.534759	0.531915
HMG-CoA_red	Hydroxymethylglutaryl-coenzyme A reductase	74	755.122	1.743	1.743	1	107	1	1	498	0	573	0.17452	1.35135	1.33333
PEP-utilizers	PEP-utilising enzyme, mobile domain	8	650.125	1.75	1.625	1	43	1	1	3529	0	3538	0.0282646	12.5	11.1111
Sigma70_r4_2	Sigma-70, region 4	4	384.5	1.75	1.75	12	94.5	1	1	9083	0	9099	0.131883	300	75
RVP_2	Retroviral aspartyl protease	9	769.444	1.778	1.778	1	142	1	1	60	0	70	1.42857	11.1111	10
zf-AN1	AN1-like Zinc finger	227	283.551	1.78	1.485	4	72	1	1	109	0	340	1.17647	1.76211	1.7316
DUF2075	Uncharacterized conserved protein (DUF2075)	32	800.406	1.781	1.781	1	463	1	1	489	0	522	0.191571	3.125	3.0303
Rhodanese	Rhodanese-like domain	552	413.364	1.788	1.712	1	84	1	1	7824	0	8377	0.0119374	0.181159	0.180832
AhpC-TSA	AhpC/TSA family	488	215.814	1.789	1.775	1	144	1	1	5344	0	5833	0.0171438	0.204918	0.204499
GGDEF	GGDEF domain	15	368.933	1.8	1.8	1	156	1	1	16016	0	16032	0.00623752	6.66667	6.25
Peptidase_S9	Prolyl oligopeptidase family	356	717.228	1.809	1.784	1	294	1	1	3915	0	4272	0.0234082	0.280899	0.280112
Tubulin	Tubulin/FtsZ family, GTPase domain	1434	351.152	1.812	1.801	2	336.5	1	1	6946	0	8382	0.0238607	0.13947	0.139276
Exostosin	Exostosin family	162	681.08	1.827	1.815	6	279.667	1	1	17	0	185	3.24324	3.7037	3.57143
TonB_dep_Rec	TonB dependent receptor	6	520.167	1.833	1.833	1	176	1	1	11443	0	11450	0.00873362	16.6667	14.2857
Peptidase_S49	Peptidase family S49	6	342.667	1.833	1.667	97	170.454	1	1	1653	0	1756	5.52392	1616.67	94.1748
K_tetra	K+ channel tetramerisation domain	1009	434.689	1.835	1.737	5	519.6	1	1	33	0	1047	0.477555	0.49554	0.493097
Hint	Hint module	158	416.07	1.854	1.759	1	1253	1	1	1	0	160	0.625	0.632911	0.628931
C1q	C1q domain	526	298.375	1.856	1.57	2	519	1	1	148	0	676	0.295858	0.380228	0.378788
TBP	Transcription factor TFIID (or TATA-binding protein, TBP)	211	318.218	1.858	1	8	293.625	1	1	69	0	288	2.77778	3.79147	3.65297
ASCH	ASCH domain	36	493.444	1.861	1.861	9	115	1	1	752	0	797	1.12923	25	20
Cullin	Cullin family	312	711.926	1.907	1.849	2	228.5	1	1	251	0	565	0.353982	0.641026	0.636943
Patatin	Patatin-like phospholipase	267	688.873	1.91	1.363	16	314.438	1	1	3485	1	3768	0.424628	5.99251	5.65371
Gly_transf_sug	Glycosyltransferase sugar-binding region containing DXD motif	102	350.706	1.912	1.912	1	251	1	1	587	0	690	0.144928	0.980392	0.970874
DUF3609	Protein of unknown function (DUF3609)	62	516.597	1.919	1.919	37	644.378	1	1	0	4	99	37.3737	59.6774	37.3737
Peptidase_M20	Peptidase family M20/M25/M40	249	422.815	1.92	1.92	2	376	1	1	9161	0	9412	0.0212495	0.803213	0.796813
DUF2370	Protein of unknown function (DUF2370)	65	230.954	1.923	1.015	1	85	1	1	62	0	128	0.78125	1.53846	1.51515
DUF88	Protein of unknown function DUF88	15	880.667	1.933	1.933	1	251	1	1	947	0	963	0.103842	6.66667	6.25
Beta-lactamase	Beta-lactamase	84	611.655	1.952	1.155	41	561.439	1	1	6981	0	7106	0.576977	48.8095	32.8
DUF699	Putative ATPase (DUF699)	43	915.465	1.953	1.93	3	460	1	1	892	0	938	0.319829	6.97674	6.52174
F-box	F-box domain	1742	486.408	1.955	1.547	13	224	1	1	978	0	2733	0.475668	0.746269	0.740741
NifU	NifU-like domain	51	244.843	1.961	1.961	1	96	1	1	1144	0	1196	0.083612	1.96078	1.92308
APS_kinase	Adenylylsulphate kinase	67	590.985	1.97	1.955	1	231	1	1	1123	0	1191	0.0839631	1.49254	1.47059
PAAD_DAPIN	PAAD/DAPIN/Pyrin domain	168	661.988	1.97	1.935	5	123	1	1	0	0	173	2.89017	2.97619	2.89017
Cyt-b5	Cytochrome b5-like Heme/Steroid binding domain	546	392.566	1.991	1.606	1	124	1	1	1243	0	1790	0.0558659	0.18315	0.182815
Lectin_C	Lectin C-type domain	3654	366.83	1.991	1.41	16	277.25	1	1	43	3	3713	0.430918	0.437876	0.435967
FHA	FHA domain	676	816.448	2	1.864	1	215	1	1	2504	0	3181	0.0314367	0.147929	0.14771
Hydrolase_3	haloacid dehalogenase-like hydrolase	10	360.7	2	2	2	186.5	1	1	5435	0	5447	0.0367175	20	16.6667
DUF830	Orthopoxvirus protein of unknown function (DUF830)	3	689.333	2	2	56	171.679	1	1	479	6	538	10.4089	1866.67	94.9153
CENP-B_N	CENP-B N-terminal DNA-binding domain	148	458.703	2.014	2.007	5	112.4	1	1	35	0	188	2.65957	3.37838	3.26797
SDA1	SDA1	36	674.917	2.028	1.889	1	270	1	1	59	0	96	1.04167	2.77778	2.7027
Smr	Smr domain	36	806.5	2.028	2	1	113	1	1	1609	0	1646	0.0607533	2.77778	2.7027
Ion_trans_2	Ion channel	810	522.362	2.044	1.375	18	96.444	1	1	1535	0	2363	0.761744	2.22222	2.17391
Arch_ATPase	Archaeal ATPase	19	825.368	2.053	1.421	2	206	1	1	668	0	689	0.290276	10.5263	9.52381
Radical_SAM	Radical SAM superfamily	239	463.741	2.054	2.05	10	279.3	1	1	20622	0	20871	0.0479134	4.1841	4.01606
zf-MYND	MYND finger	740	557.164	2.074	1.892	4	202.5	1	1	296	0	1040	0.384615	0.540541	0.537634
Polysacc_deac_1	Polysaccharide deacetylase	77	878.182	2.078	1.896	3	381.667	1	1	4959	0	5039	0.0595356	3.8961	3.75
Pyr_redox_2	Pyridine nucleotide-disulphide oxidoreductase	585	605.694	2.118	2.115	1	124	1	1	18963	0	19549	0.00511535	0.17094	0.170648
Dynamin_N	Dynamin family	584	669.577	2.128	2.08	1	592	1	1	1236	0	1821	0.0549149	0.171233	0.17094
IMPDH	IMP dehydrogenase / GMP reductase domain	122	396.525	2.139	1.541	2	347	1	1	2068	0	2192	0.0912409	1.63934	1.6129
IBR	IBR domain	363	622.006	2.149	1.419	1	990	1	1	294	0	658	0.151976	0.275482	0.274725
DUF2233	Predicted periplasmic protein (DUF2233)	16	462.75	2.188	1.75	2	600	1	1	426	0	444	0.45045	12.5	11.1111
MATH	MATH domain	553	480.675	2.231	1.888	3	266.667	1	1	67	1	623	0.481541	0.542495	0.539568
SET	SET domain	1149	847.218	2.235	1.987	11	174.636	1	1	1049	0	2209	0.497963	0.957354	0.948276
Ricin_B_lectin	Ricin-type beta-trefoil lectin domain	507	610.799	2.239	1.929	3	258.667	1	1	655	0	1165	0.257511	0.591716	0.588235
Fer4	4Fe-4S binding domain	92	380.587	2.326	1.891	3	79	1	1	6213	0	6308	0.0475587	3.26087	3.15789
Lig_chan	Ligand-gated ion channel	1090	734.934	2.338	2.301	1	433	1	1	67	0	1158	0.0863558	0.0917431	0.091659
CARD	Caspase recruitment domain	508	599.045	2.447	1.811	17	113.824	1	1	0	0	525	3.2381	3.34646	3.2381
SPRY	SPRY domain	1504	652.878	2.529	2.241	3	376	1	1	172	0	1679	0.178678	0.199468	0.199071
S4	S4 domain	263	207.369	2.612	2.612	1	57	1	1	9262	0	9526	0.0104976	0.380228	0.378788
SBP_bac_3	Bacterial extracellular solute-binding proteins, family 3	473	756.541	2.632	2.592	1	316	1	1	9713	0	10187	0.00981643	0.211416	0.21097
Y_phosphatase	Protein-tyrosine phosphatase	1506	737.911	2.643	1.666	130	298.3	1	1	227	1	1863	6.97799	8.63214	7.94621
Kunitz_BPTI	Kunitz/Bovine pancreatic trypsin inhibitor domain	1246	366.88	2.763	1.533	1	79	1	1	10	1	1257	0.0795545	0.0802568	0.0801925
PDZ	PDZ domain (Also known as DHR or GLGF)	3515	796.294	2.855	2.137	1	180	1	1	5662	0	9178	0.0108956	0.0284495	0.0284414
Calx-beta	Calx-beta domain	605	720.048	2.926	1.944	1	690	1	1	287	0	893	0.111982	0.165289	0.165017
KH_1	KH domain	1147	554.42	3.177	1.454	1	111	1	1	2740	0	3888	0.0257202	0.087184	0.087108
Flavodoxin_1	Flavodoxin	270	798.774	3.185	3.185	3	149.333	1	1	3089	0	3362	0.0892326	1.11111	1.0989
Peptidase_M43	Pregnancy-associated plasma protein-A	15	1156.33	3.267	2.267	1	872	1	1	155	0	171	0.584795	6.66667	6.25
Miro	Miro-like protein	206	1017.35	3.364	2.67	2	237	1	1	154	1	362	0.552486	0.970874	0.961538
HECT	HECT-domain (ubiquitin-transferase)	729	1152.84	3.421	1.995	1	964	1	1	325	0	1055	0.0947867	0.137174	0.136986
zf-C2H2	Zinc finger, C2H2 type	9276	472.741	3.445	1.367	6	117.667	1	1	1020	0	10302	0.0582411	0.0646831	0.0646412
Guanylate_kin	Guanylate kinase	725	701.99	3.461	2.761	42	139.738	1	1	1728	2	2495	1.68337	5.7931	5.47588
DMPK_coil	DMPK coiled coil domain like	43	1156.61	3.86	3.837	1	98	1	1	0	0	44	2.27273	2.32558	2.27273
Fer2	2Fe-2S iron-sulfur cluster binding domain	287	792.244	3.899	3.882	1	97	1	1	7550	0	7838	0.0127584	0.348432	0.347222
TIG	IPT/TIG domain	490	1154.78	3.955	2.478	1	319	1	1	360	0	851	0.117509	0.204082	0.203666
GATase	Glutamine amidotransferase class-I	1021	638.392	3.97	3.436	1	205	1	1	8800	0	9822	0.0101812	0.0979432	0.0978474
PP-binding	Phosphopantetheine attachment site	252	1303.31	4.063	3.75	1	87	1	1	10434	0	10687	0.00935716	0.396825	0.395257
PA14	PA14 domain	40	1263.55	4.275	1.95	1	1174	1	1	583	0	624	0.160256	2.5	2.43902
Formyl_trans_N	Formyl transferase	150	793.8	4.353	4.127	2	189	1	1	4281	0	4433	0.0451162	1.33333	1.31579
Herpes_UL45	UL45 protein	44	1338.16	4.682	2.045	81	178.321	1	1	0	2	125	64.8	184.091	64.8
CUB	CUB domain	1507	781.461	4.975	2.297	2	270.5	1	1	6	1	1515	0.132013	0.132714	0.132538
TIL	Trypsin Inhibitor like cysteine rich domain	551	896.485	5.528	2.087	8	221.375	1	1	2	1	561	1.42602	1.45191	1.43113
CXCXC	CXCXC repeat	30	456.8	5.6	1.7	3	99	1	1	2	1	35	8.57143	10	9.09091
EGF	EGF-like domain	2127	1016.75	8.772	2.96	6	109.667	1	1	0	0	2133	0.281294	0.282087	0.281294
Laminin_G_2	Laminin G domain	1023	1605.73	9.467	2.965	5	1198.2	1	1	122	0	1150	0.434783	0.488759	0.486381
RyR	RyR domain	63	4274.86	12.143	7.016	5	218.6	1	1	25	0	93	5.37634	7.93651	7.35294
Herpes_gE	Alphaherpesvirus glycoprotein E	5	227	1.4	1.4	184	433.886	1.011	1.011	2	0	191	96.3351	3680	97.3545
IL8	Small cytokines (intecrine/chemokine), interleukin-8 like	832	106.148	1	1	141	150.539	1.014	1.014	0	2	973	14.4913	16.9471	14.4913
FGF	Fibroblast growth factor	529	239.843	1.045	1.015	72	275.444	1.014	1	1	3	602	11.9601	13.6106	11.98
IstB	IstB-like ATP binding protein	3	247.333	1	1	57	263.825	1.018	1.018	2368	0	2428	2.34761	1900	95
Serpin	Serpin (serine protease inhibitor)	1796	365.331	1.056	1.004	170	338.2	1.018	1	131	5	2097	8.10682	9.46548	8.647
CLP_protease	Clp protease	45	241.2	1.044	1.022	52	263.058	1.019	1.019	2627	0	2724	1.90896	115.556	53.6082
YqaJ	YqaJ-like viral recombinase domain	69	409.058	1.261	1.116	51	307.725	1.02	1.02	457	1	577	8.83882	73.913	42.5
Glutaredoxin	Glutaredoxin	305	263.803	1.518	1.436	101	97.475	1.02	1.02	3285	2	3691	2.73639	33.1148	24.8768
Cauli_VI	Caulimovirus viroplasmin	39	298.538	2.103	1.923	50	489.44	1.02	1.02	313	0	402	12.4378	128.205	56.1798
TK	Thymidine kinase	33	199.879	1	1	123	178.35	1.024	1.016	829	7	985	12.4873	372.727	78.8462
Dam	DNA N-6-adenine-methyltransferase (Dam)	4	885.25	2.25	2.25	37	181.216	1.027	1	118	0	159	23.2704	925	90.2439
zf-H2C2	His(2)-Cys(2) zinc finger	28	551.893	1.929	1.929	203	148.315	1.03	1.03	69	0	300	67.6667	725	87.8788
Band_7	SPFH domain / Band 7 family	542	340.428	1.063	1.041	31	299.355	1.032	1.032	4242	0	4815	0.643821	5.71956	5.41012
S1	S1 RNA binding domain	247	722.279	2.567	2.291	30	102.933	1.033	1.033	8408	2	8685	0.345423	12.1457	10.8303
PP1c_bdg	Phosphatase-1 catalytic subunit binding region	38	430.868	1.132	1.079	28	156.357	1.036	1	0	2	66	42.4242	73.6842	42.4242
Thymidylate_kin	Thymidylate kinase	61	225.754	1	1	51	223.353	1.039	1.039	1505	5	1617	3.15399	83.6066	45.5357
UDG	Uracil DNA glycosylase superfamily	101	483.792	1.03	1.01	141	265.957	1.043	1.043	3054	8	3296	4.27791	139.604	58.2645
V-set	Immunoglobulin V-set domain	5222	318.287	1.757	1.477	181	295.182	1.044	1.044	2	7	5405	3.34875	3.4661	3.34999
DSPc	Dual specificity phosphatase, catalytic domain	929	372.643	1.414	1.398	112	180.5	1.045	1.045	837	9	1878	5.96379	12.056	10.7589
Epimerase	NAD dependent epimerase/dehydratase family	387	383.258	1.207	1.147	21	320.286	1.048	1.048	14411	0	14819	0.14171	5.42636	5.14706
Ribonuc_red_sm	Ribonucleotide reductase, small chain	73	350.822	1	1	430	320.186	1.051	1.005	1479	9	1982	21.6953	589.041	85.4871
Thymidylat_synt	Thymidylate synthase	72	268.083	1.042	1	92	286.337	1.054	1.022	1190	4	1354	6.79468	127.778	56.0976
TMV_coat	Virus coat protein (TMV like)	12	287	1	1	422	279.137	1.059	1.059	0	0	434	97.235	3516.67	97.235
Glyco_transf_25	Glycosyltransferase family 25 (LPS biosynthesis protein)	46	514.261	1.065	1.043	16	273.875	1.062	1.062	613	1	675	2.37037	34.7826	25.8065
XPG_I	XPG I-region	162	638.37	1.901	1.901	272	337.199	1.066	1.066	352	3	786	34.6056	167.901	62.6728
FA_desaturase	Fatty acid desaturase	553	338.709	1.277	1.277	14	200.929	1.071	1.071	2962	0	3529	0.396713	2.53165	2.46914
DHFR_1	Dihydrofolate reductase	66	173.788	1	1	40	210.75	1.075	1.05	1628	0	1734	2.30681	60.6061	37.7358
bZIP_1	bZIP transcription factor	862	396.008	1.284	1.278	79	286.848	1.076	1.076	659	2	1600	4.9375	9.16473	8.39532
Aminotran_1_2	Aminotransferase class I and II	635	454.176	1.175	1.107	12	211.833	1.083	1	16764	0	17411	0.0689219	1.88976	1.85471
HTH_11	HTH domain	30	337.067	1.933	1.933	11	356.909	1.091	1.091	4483	0	4524	0.243148	36.6667	26.8293
DUF1768	Domain of unknown function (DUF1768)	24	404.917	1.125	1	75	400.84	1.093	1.093	238	2	337	22.2552	312.5	75.7576
ig	Immunoglobulin domain	1100	535.059	3.122	1.865	43	267.721	1.093	1.093	0	4	1143	3.76203	3.90909	3.76203
Sema	Sema domain	600	917.77	3.257	2.263	61	256.885	1.098	1.098	0	4	661	9.22844	10.1667	9.22844
AIRS_C	AIR synthase related protein, C-terminal domain	172	785.395	3.692	3.331	41	1215.83	1.098	1.049	4621	1	4834	0.848159	23.8372	19.2488
PDGF	Platelet-derived growth factor (PDGF)	242	213.045	1.393	1.318	20	149.5	1.1	1.1	0	0	262	7.63359	8.26446	7.63359
NIF	NLI interacting factor-like phosphatase	291	374.997	1.21	1.206	19	206.368	1.105	1.105	329	2	639	2.9734	6.52921	6.12903
US22	US22 like	7	229.429	1	1	273	458.7	1.106	1.011	0	3	280	97.5	3900	97.5
Glyco_hydro_19	Chitinase class I	15	439.733	2	1.267	17	387.235	1.118	1.118	335	0	367	4.63215	113.333	53.125
Rho_N	Rho termination factor, N-terminal domain	4	911.75	2.5	2.5	25	297.04	1.12	1.12	1336	2	1365	1.8315	625	86.2069
Peptidase_M10	Matrixin	545	451.611	4.613	2.721	24	406	1.125	1.083	542	6	1111	2.16022	4.40367	4.21793
Metallophos	Calcineurin-like phosphoesterase	1515	395.67	1.299	1.275	76	332.789	1.132	1.132	11313	2	12904	0.588965	5.0165	4.77687
Chitin_bind_3	Chitin binding domain	64	269.984	1	1	58	300.966	1.138	1.138	589	1	711	8.15752	90.625	47.541
IFNGR1	Interferon gamma receptor (IFNGR1)	28	337.286	1.714	1.714	58	267.362	1.138	1.138	0	2	86	67.4419	207.143	67.4419
Fic	Fic/DOC family	31	451.581	1	1	7	282.286	1.143	1.143	1942	1	1980	0.353535	22.5806	18.4211
UPF0027	Uncharacterized protein family UPF0027	55	427.2	1.055	1	7	436.571	1.143	1	613	0	675	1.03704	12.7273	11.2903
Ras	Ras family	4288	241.229	1.119	1.087	7	208.429	1.143	1.143	1607	0	5902	0.118604	0.163246	0.16298
Abhydrolase_1	alpha/beta hydrolase fold	1169	393.246	1.471	1.441	7	277.286	1.143	1.143	16365	0	17541	0.0399065	0.598802	0.595238
TFIIB	Transcription factor TFIIB repeat	96	431.812	3.104	2.281	7	334.143	1.143	1.143	137	0	240	2.91667	7.29167	6.79612
Glycos_transf_2	Glycosyl transferase family 2	640	518.502	1.681	1.677	68	405.618	1.147	1.147	16814	0	17522	0.388084	10.625	9.60452
DNA_methylase	C-5 cytosine-specific DNA methylase	144	778.021	2.486	2.208	81	358.704	1.148	1.025	1727	1	1952	4.14959	56.25	36
Big_2	Bacterial Ig-like domain (group 2)	10	1516.8	1	1	56	291.786	1.161	1.125	1244	0	1310	4.27481	560	84.8485
TLV_coat	ENV polyprotein (coat polyprotein)	260	474.388	1.135	1.042	1779	281.091	1.162	1.063	0	11	2039	87.2487	684.231	87.2487
UQ_con	Ubiquitin-conjugating enzyme	1546	268.195	1.07	1.067	11	436.182	1.182	1.182	1044	0	2601	0.422914	0.711514	0.706487
fn3	Fibronectin type III domain	3521	1230.82	7.517	2.295	11	306.727	1.182	1.091	1381	0	4913	0.223896	0.312411	0.311438
I-set	Immunoglobulin I-set domain	6522	861.103	5.184	1.88	82	340.378	1.195	1.11	128	5	6732	1.21806	1.25728	1.24167
TrmB	Sugar-specific transcriptional regulator TrmB	11	329.636	1	1	5	114.8	1.2	1.2	660	0	676	0.739645	45.4545	31.25
AP_endonuc_2	Xylose isomerase-like TIM barrel	53	266.585	1	1	10	359.9	1.2	1.2	5001	1	5064	0.197472	18.8679	15.873
TM2	TM2 domain	140	256.514	1.264	1.214	5	87.2	1.2	1.2	717	0	862	0.580046	3.57143	3.44828
Pkinase	Protein kinase domain	13536	550.132	1.893	1.385	376	371.779	1.202	1.069	12983	14	26895	1.39803	2.77778	2.7027
Herpes_UL52	Herpesviridae UL52/UL70 DNA primase	13	585.769	1.385	1.385	111	932.171	1.207	1.198	0	2	124	89.5161	853.846	89.5161
zf-C3HC4	Zinc finger, C3HC4 type (RING finger)	4002	464.61	1.997	1.818	214	293.734	1.215	1.21	1335	8	5551	3.85516	5.34733	5.0759
AAA_5	AAA domain (dynein-related subfamily)	390	3125.33	3.572	2.672	13	374.154	1.231	1.231	2099	0	2502	0.519584	3.33333	3.22581
RRM_1	RNA recognition motif. (a.k.a. RRM, RBD, or RNP domain)	6451	437.549	1.898	1.269	21	279.143	1.238	1.238	3925	0	10397	0.201981	0.325531	0.324475
HTH_3	Helix-turn-helix	70	150.3	1.929	1.929	460	133.104	1.239	1.237	20231	0	20761	2.21569	657.143	86.7925
AAA	ATPase family associated with various cellular activities (AAA)	1971	567.387	1.838	1.702	70	380.457	1.243	1.171	15542	0	17583	0.398112	3.5515	3.42969
Flavoprotein	Flavoprotein	37	209.568	1	1	4	233	1.25	1.25	2454	2	2495	0.160321	10.8108	9.7561
MT-A70	MT-A70	91	438.56	1.011	1.011	4	260.25	1.25	1.25	178	0	273	1.4652	4.3956	4.21053
ADP_ribosyl_GH	ADP-ribosylglycohydrolase	82	366.72	1.207	1.073	4	360.25	1.25	1	730	0	816	0.490196	4.87805	4.65116
NAPRTase	Nicotinate phosphoribosyltransferase (NAPRTase) family	78	466.154	1.256	1	16	508.562	1.25	1	1219	0	1313	1.21858	20.5128	17.0213
Phosphodiest	Type I phosphodiesterase / nucleotide pyrophosphatase	269	667.87	1.725	1.461	4	813	1.25	1.25	1118	2	1391	0.287563	1.48699	1.4652
APH	Phosphotransferase enzyme family	71	527.014	2.085	2.07	12	368.833	1.25	1.25	6128	1	6211	0.193206	16.9014	14.4578
F5_F8_type_C	F5/8 type C domain	1201	772.225	4.138	2.001	4	503.75	1.25	1	1407	0	2612	0.153139	0.333056	0.33195
SWIB	SWIB/MDM2 domain	156	401.526	1.314	1.314	7	345.286	1.286	1.143	191	2	354	1.9774	4.48718	4.29448
NUDIX	NUDIX domain	607	292.107	1.242	1.213	162	251.16	1.309	1.309	13558	11	14327	1.13073	26.6886	21.0663
Thaumatin	Thaumatin family	29	224.897	1	1	3	318.333	1.333	1	36	0	68	4.41176	10.3448	9.375
DFP	DNA / pantothenate metabolism flavoprotein	51	307.529	1.039	1.039	3	336.667	1.333	1.333	1420	2	1474	0.203528	5.88235	5.55556
ATP_bind_3	PP-loop family	52	449.442	1.212	1.192	6	503.667	1.333	1.333	2342	0	2400	0.25	11.5385	10.3448
AAA_4	Divergent AAA domain	59	653.034	1.525	1.525	18	422.944	1.333	1.333	718	2	795	2.26415	30.5085	23.3766
SWIM	SWIM zinc finger	54	750.093	1.667	1.667	3	346.667	1.333	1	663	0	720	0.416667	5.55556	5.26316
VWA	von Willebrand factor type A domain	1650	739.973	3.365	1.972	6	630	1.333	1.333	2749	0	4405	0.136209	0.363636	0.362319
PAN_1	PAN domain	408	653.559	3.603	1.855	3	256.333	1.333	1	102	0	513	0.584795	0.735294	0.729927
SAP	SAP domain	451	646.073	1.914	1.8	11	338.182	1.364	1.182	357	0	819	1.3431	2.43902	2.38095
Lipase_GDSL	GDSL-like Lipase/Acylhydrolase	142	422.338	1.176	1.077	8	508.25	1.375	1.375	3393	0	3543	0.225797	5.6338	5.33333
SLT	Transglycosylase SLT domain	63	221.175	1.127	1.111	83	1175.51	1.386	1.386	4854	0	5000	1.66	131.746	56.8493
DNA_primase_S	Eukaryotic and archaeal DNA primase small subunit	50	406.42	1.1	1.1	74	396.757	1.392	1.392	365	7	489	15.1329	148	59.6774
Ribonuclease_3	RNase3 domain	177	1400.23	4.22	3.333	25	349.56	1.4	1.32	2017	2	2219	1.12663	14.1243	12.3762
IRF-3	Interferon-regulatory factor 3	160	428.212	1.919	1.9	46	386.413	1.413	1.413	0	0	206	22.3301	28.75	22.3301
CTP_transf_2	Cytidylyltransferase	236	353.729	1.398	1.186	9	288.333	1.444	1.444	3888	0	4133	0.217759	3.81356	3.67347
Zeta_toxin	Zeta toxin	77	706.857	2.286	2.273	22	407.273	1.455	1.455	660	0	759	2.89855	28.5714	22.2222
CBM_14	Chitin binding Peritrophin-A domain	1810	524.23	2.806	1.274	118	422.576	1.466	1.458	22	2	1950	6.05128	6.51934	6.12033
DUF862	PPPDE putative peptidase domain	72	209.847	1	1	12	1579.67	1.5	1.5	55	0	139	8.63309	16.6667	14.2857
ART	NAD:arginine ADP-ribosyltransferase	145	285.91	1.186	1.076	2	1313	1.5	1.5	58	0	205	0.97561	1.37931	1.36054
Asn_synthase	Asparagine synthase	89	519.697	1.247	1.247	2	528	1.5	1.5	1994	0	2085	0.0959233	2.24719	2.1978
HMG_box	HMG (high mobility group) box	2534	327.816	1.459	1.272	6	204.333	1.5	1	816	2	3356	0.178784	0.23678	0.23622
NTP_transferase	Nucleotidyl transferase	157	399.076	1.49	1.42	6	381.333	1.5	1.5	8578	0	8741	0.068642	3.82166	3.68098
Peptidase_S8	Subtilase family	443	759.515	1.896	1.878	2	644	1.5	1.5	4263	0	4708	0.0424809	0.451467	0.449438
RFC-E_C	Clamp-loader complex subunit E C-terminus	44	338.045	1.909	1.909	2	347	1.5	1.5	59	0	105	1.90476	4.54545	4.34783
AICARFT_IMPCHas	AICARFT/IMPCHase bienzyme	50	566.58	1.94	1.92	2	254.5	1.5	1.5	1494	0	1546	0.129366	4	3.84615
DHH	DHH family	28	457.393	1.964	1.964	2	576.5	1.5	1.5	3114	0	3144	0.0636132	7.14286	6.66667
HTH_psq	helix-turn-helix, Psq domain	189	713.46	2.169	1.598	2	475.5	1.5	1.5	519	0	710	0.28169	1.0582	1.04712
CBM_4_9	Carbohydrate binding domain	5	712	2.8	2	8	940.5	1.5	1.5	448	0	461	1.73536	160	61.5385
DHHA1	DHHA1 domain	51	862.608	2.863	2.824	2	494.5	1.5	1.5	3911	0	3964	0.0504541	3.92157	3.77358
H2TH	Formamidopyrimidine-DNA glycosylase H2TH domain	34	390.559	2.882	2.618	2	280.5	1.5	1.5	1537	0	1573	0.127146	5.88235	5.55556
Ku	Ku70/Ku80 beta-barrel domain	120	604.333	3.058	3.058	2	283	1.5	1.5	554	0	676	0.295858	1.66667	1.63934
PKD	PKD domain	109	1339.42	3.578	2.037	2	318	1.5	1	754	0	865	0.231214	1.83486	1.8018
RCC1	Regulator of chromosome condensation (RCC1) repeat	557	1039.12	5.32	1.738	4	118.5	1.5	1	449	0	1010	0.39604	0.718133	0.713012
FAD_binding_7	FAD binding domain of DNA photolyase	199	519.201	1.879	1.869	20	367.7	1.55	1.55	1371	3	1590	1.25786	10.0503	9.13242
KaiC	KaiC	17	491.882	1	1	7	399.714	1.571	1.571	1627	0	1651	0.423985	41.1765	29.1667
CBM_2	Cellulose binding domain	28	569.429	2.143	2	7	742.857	1.571	1.429	489	0	524	1.33588	25	20
BEN	BEN domain	155	480.845	1.284	1.155	79	490.962	1.595	1.038	0	4	234	33.7607	50.9677	33.7607
NTP_transf_2	Nucleotidyltransferase domain	272	589.938	2.404	2.195	5	295.8	1.6	1.6	2834	0	3111	0.16072	1.83824	1.80505
zf-GRF	GRF zinc finger	86	725.512	3.174	2.756	21	452.619	1.619	1.619	69	0	176	11.9318	24.4186	19.6262
ResIII	Type III restriction enzyme, res subunit	197	1030.34	2.071	2.03	228	586.838	1.627	1.623	5460	8	5885	3.87426	115.736	53.6471
GP41	Retroviral envelope protein	36	626.083	1.167	1.167	17827	563.731	1.635	1.627	0	0	17863	99.7985	49519.4	99.7985
BIR	Inhibitor of Apoptosis domain	302	703.142	2.202	1.311	144	286.708	1.646	1.188	57	5	503	28.6282	47.6821	32.287
NMT	Myristoyl-CoA:protein N-myristoyltransferase, N-terminal domain	68	459.25	1.956	1.956	3	318.667	1.667	1.667	63	1	134	2.23881	4.41176	4.22535
tRNA_anti	OB-fold nucleic acid binding domain	328	487.375	2.04	1.991	3	618.333	1.667	1.667	7717	0	8048	0.0372763	0.914634	0.906344
zf-FCS	MYM-type Zinc finger with FCS sequence motif	105	1026.51	4.086	1.857	67	168.567	1.687	1.687	14	6	186	36.0215	63.8095	38.9535
TNFR_c6	TNFR/NGFR cysteine-rich region	336	336.065	1.955	1.354	208	219.976	1.688	1.293	0	4	544	38.2353	61.9048	38.2353
C1-set	Immunoglobulin C1-set domain	8688	275.624	2.179	2.135	73	356.767	1.699	1.699	0	1	8761	0.833238	0.840239	0.833238
DED	Death effector domain	249	564.217	2.446	1.767	21	191.286	1.714	1	0	1	270	7.77778	8.43373	7.77778
Amidase_2	N-acetylmuramoyl-L-alanine amidase	349	260.937	1.089	1.011	145	306.455	1.717	1.538	2302	0	2796	5.18598	41.5473	29.3522
DNA_ligase_A_M	ATP dependent DNA ligase domain	115	801.913	3.383	3.278	153	440.889	1.719	1.706	1033	7	1301	11.7602	133.043	57.0896
DUF755	Domain of unknown function (DUF755)	10	1152.1	1	1	77	253.299	1.727	1.727	0	0	87	88.5057	770	88.5057
DNA_topoisoIV	DNA gyrase/topoisomerase IV, subunit A	71	1216.01	2.845	2.803	37	812.973	1.73	1.676	4233	2	4341	0.852338	52.1127	34.2593
TFIIS_C	Transcription factor S-II (TFIIS)	221	191.751	2.109	2.09	90	211.856	1.733	1.733	214	8	525	17.1429	40.724	28.9389
GMC_oxred_C	GMC oxidoreductase	312	598.532	2.01	1.952	4	374.25	1.75	1.5	2811	0	3127	0.127918	1.28205	1.26582
Avian_gp85	Avian retrovirus envelope protein, gp85	7	440.714	2.143	2	117	487.65	1.752	1.752	0	3	124	94.3548	1671.43	94.3548
Topoisom_I	Eukaryotic DNA topoisomerase I, catalytic core	88	560.489	1.682	1.67	74	276.581	1.757	1.757	246	6	408	18.1373	84.0909	45.679
Cyclin_N	Cyclin, N-terminal domain	1059	397.678	1.527	1.52	18	303.333	1.778	1.778	580	1	1657	1.0863	1.69972	1.67131
BRCT	BRCA1 C Terminus (BRCT) domain	537	882.495	2.875	2.218	14	371.5	1.786	1.714	2109	1	2660	0.526316	2.60708	2.54083
Peptidase_C1	Papain family cysteine protease	1620	309.455	1.687	1.677	60	348.617	1.8	1.783	180	4	1860	3.22581	3.7037	3.57143
dsrm	Double-stranded RNA binding motif	718	691.471	2.862	2.015	130	252.3	1.808	1.792	1559	4	2407	5.40091	18.1058	15.3302
PCNA_N	Proliferating cell nuclear antigen, N-terminal domain	114	214.632	1.833	1.833	27	265.148	1.815	1.815	58	0	199	13.5678	23.6842	19.1489
WH2	WH2 motif	182	586.5	2.005	1.67	22	515.545	1.818	1	44	0	248	8.87097	12.0879	10.7843
PLD_envelope	Phospholipase D/viral envelope	73	465.959	1.795	1.767	168	291.893	1.821	1.446	20	5	261	64.3678	230.137	69.7095
Glyco_transf_10	Glycosyltransferase family 10 (fucosyltransferase)	392	377.671	1.059	1.015	6	814	1.833	1.833	79	0	477	1.25786	1.53061	1.50754
DNA_photolyase	DNA photolyase	181	548.011	1.972	1.961	13	450	1.846	1.846	1076	3	1270	1.02362	7.18232	6.70103
DUF303	Domain of unknown function (DUF303)	18	481	1.167	1.111	20	583.75	1.85	1.85	505	0	543	3.68324	111.111	52.6316
Aminotran_3	Aminotransferase class-III	191	430.361	1.005	1	7	330.286	1.857	1	7671	0	7869	0.0889567	3.66492	3.53535
TROVE	TROVE domain	42	865.905	3.405	1.405	7	553	1.857	1	75	0	124	5.64516	16.6667	14.2857
Glyco_hydro_18	Glycosyl hydrolases family 18	808	527.442	1.559	1.335	66	605.894	1.879	1.864	3141	1	4015	1.64384	8.16832	7.55149
Peptidase_S24	Peptidase S24-like	150	174.447	1	1	109	229.092	1.881	1.881	5449	0	5708	1.9096	72.6667	42.0849
PG_binding_1	Putative peptidoglycan binding domain	404	497.483	5.265	3.072	33	325.818	1.909	1.879	2795	0	3232	1.02104	8.16832	7.55149
PCNA_C	Proliferating cell nuclear antigen, C-terminal domain	99	240.212	1.96	1.96	26	275	1.923	1.923	55	0	180	14.4444	26.2626	20.8
Peptidase_M23	Peptidase family M23	22	699.591	1.136	1.091	50	1266.9	1.94	1.94	5933	0	6005	0.832639	227.273	69.4444
Herpes_gp2	Equine herpesvirus glycoprotein gp2	7	467.143	1.571	1.429	36	481.694	1.944	1	1	0	44	81.8182	514.286	83.7209
IRF	Interferon regulatory factor transcription factor	286	345.983	1.51	1.5	20	378.05	1.95	1.95	0	0	306	6.53595	6.99301	6.53595
z-alpha	Adenosine deaminase z-alpha domain	42	685.429	3.524	2.095	87	184.759	1.954	1.954	0	3	129	67.4419	207.143	67.4419
MHC_I	Class I Histocompatibility antigen, domains alpha 1 and 2	10553	222.392	1.666	1.666	51	354.941	1.98	1.98	0	0	10604	0.480951	0.483275	0.480951
ChitinaseA_N	Chitinase A, N-terminal domain	9	554.778	2	2	54	556.241	1.981	1.981	130	1	193	27.9793	600	85.7143
Pox_MCEL	mRNA capping enzyme	50	357.64	1	1	65	827.123	1.985	1.985	65	6	180	36.1111	130	56.5217
GIY-YIG	GIY-YIG catalytic domain	39	295.564	1.385	1.359	125	204.808	1.992	1.384	3057	2	3221	3.88078	320.513	76.2195
MAP1_LC3	Microtubule associated protein 1A/1B, light chain 3	207	120.923	1.005	1	2	289	2	2	63	0	272	0.735294	0.966184	0.956938
Rad9	Rad9	56	366.196	1.018	1.018	2	267.5	2	2	56	0	114	1.75439	3.57143	3.44828
HCR	Alpha helical coiled-coil rod protein (HCR)	92	311.935	1.043	1	1	235	2	2	0	0	93	1.07527	1.08696	1.07527
RNB	RNB domain	94	1136.39	1.074	1.032	1	528	2	2	1923	0	2018	0.049554	1.06383	1.05263
Sugar_tr	Sugar (and other) transporter	1895	487.382	1.093	1.042	1	429	2	1	7481	0	9377	0.0106644	0.0527704	0.0527426
Orn_Arg_deC_N	Pyridoxal-dependent decarboxylase, pyridoxal binding domain	1052	104.147	1.121	1.12	6	371.833	2	2	2560	0	3618	0.165837	0.570342	0.567108
dTDP_sugar_isom	dTDP-4-dehydrorhamnose 3,5-epimerase	6	239.333	1.167	1.167	1	393	2	2	1290	0	1297	0.077101	16.6667	14.2857
KTI12	Chromatin associated protein KTI12	90	525.844	1.167	1.1	2	529.5	2	2	225	0	317	0.630915	2.22222	2.17391
B_lectin	D-mannose binding lectin	11	113.545	1.182	1	1	199	2	1	53	0	65	1.53846	9.09091	8.33333
AMP-binding	AMP-binding enzyme	1475	599.211	1.289	1.184	1	832	2	2	19841	0	21317	0.00469109	0.0677966	0.0677507
bZIP_Maf	bZIP Maf transcription factor	161	246.05	1.329	1.329	1	369	2	2	2	1	164	0.609756	0.621118	0.617284
eIF-5_eIF-2B	Domain found in IF2B/IF5	117	336.889	1.368	1.368	2	426	2	2	123	0	242	0.826446	1.7094	1.68067
DAO	FAD dependent oxidoreductase	440	519.461	1.418	1.407	1	354	2	2	9991	0	10432	0.00958589	0.227273	0.226757
Ski_Sno	SKI/SNO/DAC family	196	586.204	1.5	1.495	1	437	2	2	0	1	197	0.507614	0.510204	0.507614
MR_MLE	Mandelate racemase / muconate lactonizing enzyme, C-terminal domain	19	395.526	1.684	1.684	1	380	2	2	3161	0	3181	0.0314367	5.26316	5
G6PD_N	Glucose-6-phosphate dehydrogenase, NAD binding domain	241	359.402	1.697	1.685	1	481	2	2	1401	0	1643	0.0608643	0.414938	0.413223
EamA	EamA-like transporter family	265	323.653	1.717	1.174	1	295	2	1	13142	0	13408	0.00745823	0.377358	0.37594
LysR_substrate	LysR substrate binding domain	11	230.545	1.727	1.727	1	297	2	2	32123	0	32135	0.00311187	9.09091	8.33333
Jun	Jun-like transcription factor	140	264.607	1.743	1.721	1	287	2	2	0	1	141	0.70922	0.714286	0.70922
Skp1_POZ	Skp1 family, tetramerisation domain	243	156.374	1.757	1.753	6	152.5	2	2	102	0	351	1.7094	2.46914	2.40964
Peptidase_M13_N	Peptidase family M13	703	621.492	1.782	1.713	1	615	2	2	608	0	1312	0.0762195	0.142248	0.142045
XPG_N	XPG N-terminal domain	174	628.833	1.833	1.833	18	358.222	2	2	297	3	489	3.68098	10.3448	9.375
Peptidase_M13	Peptidase family M13	645	625.786	1.85	1.778	1	615	2	2	578	0	1224	0.0816993	0.155039	0.154799
W2	eIF4-gamma/eIF5/eIF2-epsilon	243	686.593	1.864	1.864	2	426	2	2	115	0	360	0.555556	0.823045	0.816327
G6PD_C	Glucose-6-phosphate dehydrogenase, C-terminal domain	194	406.031	1.871	1.851	1	481	2	2	1603	0	1798	0.0556174	0.515464	0.512821
Sod_Fe_C	Iron/manganese superoxide dismutases, C-terminal domain	186	201.769	1.876	1.876	1	204	2	2	3239	0	3426	0.0291886	0.537634	0.534759
Gln-synt_C	Glutamine synthetase, catalytic domain	130	371.131	1.9	1.892	1	353	2	2	4018	0	4149	0.0241022	0.769231	0.763359
Skp1	Skp1 family, dimerisation domain	205	169.522	1.902	1.898	6	152.5	2	2	63	0	274	2.18978	2.92683	2.8436
PDGF_N	Platelet-derived growth factor, N terminal region	54	200.611	1.907	1.907	2	248.5	2	2	0	0	56	3.57143	3.7037	3.57143
Tissue_fac	Tissue factor	251	386.944	1.908	1.825	8	269.625	2	2	1	0	260	3.07692	3.18725	3.0888
Arrestin_N	Arrestin (or S-antigen), N-terminal domain	597	399.926	1.915	1.888	1	306	2	2	286	1	884	0.113122	0.167504	0.167224
Sod_Fe_N	Iron/manganese superoxide dismutases, alpha-hairpin domain	177	209.136	1.921	1.921	1	204	2	2	3102	0	3280	0.0304878	0.564972	0.561798
2-Hacid_dh_C	D-isomer specific 2-hydroxyacid dehydrogenase, NAD binding domain	246	375.984	1.923	1.919	3	351.667	2	2	6195	0	6444	0.0465549	1.21951	1.20482
MR_MLE_N	Mandelate racemase / muconate lactonizing enzyme, N-terminal domain	14	409.071	1.929	1.929	1	380	2	2	2532	0	2547	0.0392619	7.14286	6.66667
NMT_C	Myristoyl-CoA:protein N-myristoyltransferase, C-terminal domain	70	450.886	1.929	1.929	2	328.5	2	2	73	0	145	1.37931	2.85714	2.77778
Gln-synt_N	Glutamine synthetase, beta-Grasp domain	124	372.056	1.944	1.935	1	353	2	2	2286	0	2411	0.0414766	0.806452	0.8
Orn_DAP_Arg_deC	Pyridoxal-dependent decarboxylase, C-terminal sheet domain	133	409.045	1.947	1.94	6	371.833	2	2	2703	0	2842	0.211119	4.51128	4.31655
Lipid_DES	Sphingolipid Delta4-desaturase (DES)	66	310.848	1.955	1.955	1	320	2	2	55	0	122	0.819672	1.51515	1.49254
ADH_N	Alcohol dehydrogenase GroES-like domain	539	400.963	1.957	1.944	1	422	2	2	13157	0	13697	0.00730087	0.185529	0.185185
Arrestin_C	Arrestin (or S-antigen), C-terminal domain	561	410.672	1.97	1.943	1	306	2	2	255	1	817	0.122399	0.178253	0.177936
Rep_fac_C	Replication factor C	124	335.718	1.976	1.968	5	331.2	2	2	178	0	307	1.62866	4.03226	3.87597
c-SKI_SMAD_bind	c-SKI Smad4 binding domain	98	539.837	1.99	1.98	1	437	2	2	0	1	99	1.0101	1.02041	1.0101
Inhibitor_I29	Cathepsin propeptide inhibitor domain (I29)	873	337.554	1.991	1.946	47	335.383	2	2	0	2	920	5.1087	5.38373	5.1087
DUF583	Protein of unknown function, DUF583	3	131.667	2	1	1	982	2	1	818	0	822	0.121655	33.3333	25
HTH_1	Bacterial regulatory helix-turn-helix protein, lysR family	8	247.5	2	2	1	297	2	2	32410	0	32419	0.00308461	12.5	11.1111
Maf_N	Maf N-terminal region	53	316.302	2	2	1	369	2	2	0	1	54	1.85185	1.88679	1.85185
GMC_oxred_N	GMC oxidoreductase	311	602.646	2.01	1.955	4	529.25	2	1.5	2648	0	2963	0.134998	1.28617	1.26984
2-Hacid_dh	D-isomer specific 2-hydroxyacid dehydrogenase, catalytic domain	224	391.411	2.013	2.009	3	351.667	2	2	5177	0	5404	0.0555144	1.33929	1.32159
DALR_1	DALR anticodon binding domain	107	522.953	2.019	1.991	1	600	2	2	2329	0	2437	0.0410341	0.934579	0.925926
CD47	CD47 transmembrane region	15	304.867	2.067	2	42	281.286	2	2	0	3	57	73.6842	280	73.6842
R3H	R3H domain	193	783.907	2.166	1.979	1	399	2	2	695	0	889	0.112486	0.518135	0.515464
LNS2	LNS2 (Lipin/Ned1/Smp2)	122	892.303	2.189	2.09	1	292	2	2	71	0	194	0.515464	0.819672	0.813008
ADH_zinc_N	Zinc-binding dehydrogenase	732	539.016	2.251	2.238	1	422	2	2	13730	0	14463	0.00691419	0.136612	0.136426
Peptidase_M16_C	Peptidase M16 inactive domain	373	651.893	2.271	1.954	1	440	2	2	3699	0	4073	0.0245519	0.268097	0.26738
GTP_EFTU	Elongation factor Tu GTP binding domain	10098	319.597	2.274	2.272	1	480	2	2	16623	0	26722	0.00374223	0.00990295	0.00990197
V-set_CD47	CD47 immunoglobulin-like domain	17	427.647	2.294	2.118	42	281.286	2	2	0	3	59	71.1864	247.059	71.1864
Peptidase_M16	Insulinase (Peptidase family M16)	345	651.052	2.31	2	1	440	2	2	3291	0	3637	0.0274952	0.289855	0.289017
Peptidase_M41	Peptidase family M41	131	659.374	2.328	2.305	1	579	2	2	2147	0	2279	0.0438789	0.763359	0.757576
ABC_tran	ABC transporter	2459	907.201	2.386	1.685	9	930.222	2	1.222	94830	1	97298	0.00924993	0.366002	0.364668
FYVE	FYVE zinc finger	656	862.468	2.529	2.012	1	701	2	2	280	0	937	0.106724	0.152439	0.152207
Lon_C	Lon protease (S16) C-terminal proteolytic domain	78	743.744	2.577	2.551	1	1023	2	2	3709	0	3788	0.0263992	1.28205	1.26582
RFC1	Replication factor RFC1 C terminal domain	38	851.789	2.579	2.579	1	533	2	2	65	0	104	0.961538	2.63158	2.5641
Nucleos_tra2_C	Na+ dependent nucleoside transporter C-terminus	81	571.395	2.593	2.543	1	579	2	2	1434	0	1516	0.0659631	1.23457	1.21951
GTP_EFTU_D3	Elongation factor Tu C-terminal domain	6478	320.357	2.616	2.615	1	480	2	2	4016	0	10495	0.00952835	0.0154369	0.0154345
Nucleos_tra2_N	Na+ dependent nucleoside transporter N-terminus	75	592.453	2.693	2.667	1	579	2	2	1417	0	1493	0.0669792	1.33333	1.31579
TFIIS_M	Transcription factor S-II (TFIIS), central domain	140	615.686	2.8	2.764	9	183.556	2	2	110	0	259	3.4749	6.42857	6.04027
Fapy_DNA_glyco	Formamidopyrimidine-DNA glycosylase N-terminal domain	26	371.154	2.885	2.731	1	287	2	2	1510	0	1537	0.0650618	3.84615	3.7037
C2-set_2	CD80-like C2-set immunoglobulin domain	1031	584.974	2.896	2.237	1	284	2	2	0	0	1032	0.0968992	0.0969932	0.0968992
TF_Zn_Ribbon	TFIIB zinc-binding	113	432.584	2.956	2.301	1	461	2	2	130	0	244	0.409836	0.884956	0.877193
PAS_4	PAS fold	9	1015	3	3	1	235	2	2	7249	0	7259	0.013776	11.1111	10
PSI	Plexin repeat	547	1091.79	3.943	2.634	6	562.667	2	2	7	2	560	1.07143	1.09689	1.08499
OTCace_N	Aspartate/ornithine carbamoyltransferase, carbamoyl-P binding domain	74	1076.77	5.311	4.568	3	321.667	2	2	3191	0	3268	0.0917993	4.05405	3.8961
PT	PT repeat	36	665.25	5.528	3.083	1	81	2	1	73	0	110	0.909091	2.77778	2.7027
MGS	MGS-like domain	104	1208.51	5.654	4.731	1	196	2	2	3361	0	3466	0.0288517	0.961538	0.952381
RHS_repeat	RHS Repeat	17	2428.29	5.824	2.353	1	1683	2	1	1250	0	1268	0.0788644	5.88235	5.55556
OTCace	Aspartate/ornithine carbamoyltransferase, Asp/Orn binding domain	63	1195.94	6.032	5.175	3	321.667	2	2	3186	0	3252	0.0922509	4.7619	4.54545
zf-CCCH	Zinc finger C-x8-C-x5-C-x3-H type (and similar)	816	465.881	1.854	1.433	32	189.906	2.031	2.031	394	1	1242	2.57649	3.92157	3.77358
SNF2_N	SNF2 family N-terminal domain	836	1266.58	3.132	2.85	156	647.635	2.122	2.122	3408	8	4400	3.54545	18.6603	15.7258
Ribonuc_red_lgC	Ribonucleotide reductase, barrel domain	53	726.358	2.717	2.717	270	709.507	2.133	2.07	1978	9	2301	11.734	509.434	83.5913
Pkinase_Tyr	Protein tyrosine kinase	4626	728.206	2.46	2.072	67	557.388	2.134	2.09	175	17	4868	1.37634	1.44834	1.42766
DNA_gyraseB	DNA gyrase B	63	1279.13	3.111	3.095	37	881.919	2.135	2.108	7981	2	8081	0.457864	58.7302	37
LRR_1	Leucine Rich Repeat	7114	534.426	3.659	1.656	7	513.571	2.143	1	2019	0	9140	0.0765864	0.0983975	0.0983008
mRNA_cap_enzyme	mRNA capping enzyme, catalytic domain	51	558.667	2.765	2.745	18	609	2.167	2.167	66	0	135	13.3333	35.2941	26.087
mRNA_cap_C	mRNA capping enzyme, C-terminal domain	42	592.024	2.952	2.929	9	366.778	2.222	2.222	61	0	112	8.03571	21.4286	17.6471
zf-C4	Zinc finger, C4 type (two domains)	3447	444.594	1.936	1.915	4	663.5	2.25	2.25	0	1	3451	0.115908	0.116043	0.115908
Hormone_recep	Ligand-binding domain of nuclear hormone receptor	3107	460.433	2.014	1.998	4	663.5	2.25	2.25	0	1	3111	0.128576	0.128742	0.128576
HATPase_c	Histidine kinase-, DNA gyrase B-, and HSP90-like ATPase	763	625.823	2.109	2.081	45	707.2	2.267	2.244	50311	2	51119	0.0880299	5.89777	5.56931
LysM	LysM domain	154	516.175	1.623	1.474	48	453.917	2.312	1.771	5935	0	6137	0.782141	31.1688	23.7624
ubiquitin	Ubiquitin family	1617	326.73	2.084	1.562	89	399.596	2.315	2.067	593	3	2299	3.87125	5.50402	5.21688
RVP	Retroviral aspartyl protease	172	601.831	2.453	2.366	75597	319.886	2.35	2.343	271	5	76040	99.4174	43951.7	99.773
GATase_2	Glutamine amidotransferases class-II	179	764.95	2.838	2.363	11	516.364	2.364	1.727	4934	0	5124	0.214676	6.14525	5.78947
Hydrolase	haloacid dehalogenase-like hydrolase	1301	784.905	2.646	2.482	5	574.2	2.4	2.4	19282	0	20588	0.024286	0.38432	0.382848
Myc_N	Myc amino-terminal region	1332	194.935	2.201	2.185	24	289.417	2.417	2.333	0	6	1356	1.76991	1.8018	1.76991
Ank	Ankyrin repeat	4663	737.059	4.336	1.79	457	462.204	2.481	1.446	3871	7	8991	5.08286	9.80056	8.92578
An_peroxidase	Animal haem peroxidase	526	768.053	1.962	1.582	2	581	2.5	1	202	0	730	0.273973	0.380228	0.378788
DnaJ_C	DnaJ C terminal region	385	369.787	2.343	2.332	4	304	2.5	2.5	2930	0	3319	0.120518	1.03896	1.02828
DSHCT	DSHCT (NUC185) domain	89	1003.99	2.73	2.708	6	718.167	2.5	2.5	271	0	366	1.63934	6.74157	6.31579
WD40	WD domain, G-beta repeat	7746	631.842	4.473	1.391	4	411	2.5	1.5	7209	0	14959	0.0267398	0.0516396	0.0516129
Hemopexin	Hemopexin	554	451.108	4.758	2.605	2	646.5	2.5	2	18	0	574	0.348432	0.361011	0.359712
Gag_p24	gag gene protein p24 (core nucleocapsid protein)	73	548.123	3.082	2.658	21914	295.652	2.501	2.202	0	5	21987	99.668	30019.2	99.668
Ribonuc_red_lgN	Ribonucleotide reductase, all-alpha domain	47	772.298	2.936	2.936	197	771.061	2.513	2.472	1579	6	1823	10.8064	419.149	80.7377
DnaJ	DnaJ domain	1709	400.564	1.801	1.682	443	493.995	2.519	2.519	6449	0	8601	5.15056	25.9216	20.5855
Glyco_hydro_25	Glycosyl hydrolases family 25	8	222.875	1	1	48	376.25	2.562	1.854	1098	0	1154	4.15945	600	85.7143
UPF0547	Uncharacterised protein family UPF0547	11	161.909	1	1	7	355.143	2.571	2.429	84	0	102	6.86275	63.6364	38.8889
dUTPase	dUTPase	77	256.052	1.883	1.792	563	355.318	2.575	2.526	1891	15	2531	22.2442	731.169	87.9688
Toprim	Toprim domain	79	813.835	3.013	2.709	43	565.465	2.581	2.558	8022	0	8144	0.527996	54.4304	35.2459
Adeno_E3_CR2	Adenovirus E3 region protein CR2	4	375.5	3	3	80	257.663	2.6	2	0	0	84	95.2381	2000	95.2381
T_Ag_DNA_bind	Origin of replication binding protein	3	333.667	1.667	1.667	344	607.073	2.66	2.66	0	0	347	99.1354	11466.7	99.1354
Ham1p_like	Ham1 family	45	189.289	1	1	9	699.333	2.667	2.667	1471	0	1525	0.590164	20	16.6667
PI3_PI4_kinase	Phosphatidylinositol 3- and 4-kinase	537	1413.12	2.916	2.87	3	682.667	2.667	2.667	546	0	1086	0.276243	0.558659	0.555556
Cmyb_C	C-myb, C-terminal	78	575.526	3.795	2.282	3	304	2.667	2.333	0	1	81	3.7037	3.84615	3.7037
SIS	SIS domain	80	611.812	2.987	1.837	8	554.25	2.75	1.875	7731	0	7819	0.102315	10	9.09091
SH3_1	SH3 domain	3103	681.96	3.419	2.398	28	468.179	2.75	2.75	1078	6	4209	0.665241	0.902353	0.894283
Wos2	Wos2 motif	46	554.978	4.239	2.652	4	395.25	2.75	2.5	0	2	50	8	8.69565	8
SH2	SH2 domain	2299	576.555	2.79	2.568	39	524.205	2.769	2.769	39	7	2377	1.64072	1.69639	1.66809
UDPG_MGDP_dh	UDP-glucose/GDP-mannose dehydrogenase family, central domain	49	456.776	2.918	2.918	9	375.778	2.778	2.778	2366	0	2424	0.371287	18.3673	15.5172
FCH	Fes/CIP4 homology domain	408	636.436	2.066	2.005	5	656.4	2.8	2.8	265	1	678	0.737463	1.22549	1.21065
G-patch	G-patch domain	699	592.628	1.851	1.82	38	319.842	2.816	2.789	344	1	1081	3.51526	5.43634	5.15604
Phlebovirus_G2	Phlebovirus glycoprotein G2	6	1396	3.667	3.5	120	875.158	2.833	2.425	0	3	126	95.2381	2000	95.2381
PLDc	Phospholipase D Active site motif	113	767.549	2.345	2.035	75	374.987	2.84	2	1890	5	2078	3.60924	66.3717	39.8936
ATP-cone	ATP cone domain	44	774.545	2.977	2.977	96	745.99	2.885	2.875	2510	3	2650	3.62264	218.182	68.5714
Pentapeptide	Pentapeptide repeats (8 copies)	42	289.024	4.333	1.929	10	231.2	2.9	1	2421	0	2473	0.404367	23.8095	19.2308
DNA_ligase_A_N	DNA ligase N terminus	122	783.475	3.238	3.148	55	562.836	2.909	2.909	402	4	579	9.49914	45.082	31.0734
HLH	Helix-loop-helix DNA-binding domain	4106	322.781	1.802	1.787	17	404.647	2.941	2.882	513	6	4636	0.366695	0.414028	0.412321
DNA_ligase_A_C	ATP dependent DNA ligase C terminal region	105	816.695	3.524	3.41	54	566.759	2.963	2.944	745	5	904	5.97345	51.4286	33.9623
Actin	Actin	2560	265.798	1.019	1.005	1	545	3	3	2751	0	5312	0.0188253	0.0390625	0.0390472
6PGD	6-phosphogluconate dehydrogenase, C-terminal domain	268	230.25	1.228	1.224	1	345	3	2	1513	0	1782	0.0561167	0.373134	0.371747
Ets	Ets-domain	742	396.425	1.559	1.542	1	669	3	3	0	1	743	0.13459	0.134771	0.13459
NAD_binding_2	NAD binding domain of 6-phosphogluconate dehydrogenase	150	419.18	1.567	1.547	1	345	3	2	4201	0	4352	0.0229779	0.666667	0.662252
Gal-bind_lectin	Galactoside-binding lectin	541	272.919	1.695	1.061	1	703	3	2	21	0	563	0.17762	0.184843	0.184502
S-antigen	S-antigen protein	12	393.083	1.833	1.167	1	456	3	2	9	0	22	4.54545	8.33333	7.69231
BCS1_N	BCS1 N terminal	39	405.179	1.974	1.949	1	508	3	2	167	0	207	0.483092	2.5641	2.5
SAM_PNT	Sterile alpha motif (SAM)/Pointed domain	347	450.271	1.997	1.919	1	669	3	3	0	1	348	0.287356	0.288184	0.287356
IMS	impB/mucB/samB family	150	726.507	2.287	2.26	1	416	3	3	2635	0	2786	0.0358938	0.666667	0.662252
MutS_I	MutS domain I	277	483.675	2.303	2.264	1	1124	3	3	1535	0	1813	0.0551572	0.361011	0.359712
IMS_C	impB/mucB/samB family C-terminal	132	778.667	2.424	2.394	1	416	3	3	2219	0	2352	0.042517	0.757576	0.75188
Guanylate_cyc	Adenylate and Guanylate cyclase catalytic domain	1016	905.39	2.549	2.224	3	1644	3	2	1895	0	2914	0.102951	0.295276	0.294406
Mito_carr	Mitochondrial carrier protein	2150	303.196	2.575	1.009	3	251.667	3	1	2064	0	4217	0.0711406	0.139535	0.13934
TPP_enzyme_N	Thiamine pyrophosphate enzyme, N-terminal TPP binding domain	64	538.469	2.766	2.766	1	553	3	3	5709	0	5774	0.017319	1.5625	1.53846
TPP_enzyme_C	Thiamine pyrophosphate enzyme, C-terminal TPP binding domain	60	546	2.783	2.783	1	553	3	3	7625	0	7686	0.0130107	1.66667	1.63934
eRF1_1	eRF1 domain 1	101	378.317	2.812	2.812	1	355	3	3	122	0	224	0.446429	0.990099	0.980392
UDPG_MGDP_dh_N	UDP-glucose/GDP-mannose dehydrogenase family, NAD binding domain	51	444.392	2.843	2.843	8	390.125	3	3	2379	0	2438	0.328138	15.6863	13.5593
TPP_enzyme_M	Thiamine pyrophosphate enzyme, central domain	60	562.033	2.867	2.867	1	553	3	3	4855	0	4916	0.0203417	1.66667	1.63934
eRF1_2	eRF1 domain 2	97	388.938	2.876	2.876	1	355	3	3	125	0	223	0.44843	1.03093	1.02041
UDPG_MGDP_dh_C	UDP-glucose/GDP-mannose dehydrogenase family, UDP binding domain	48	465.938	2.917	2.917	8	390.125	3	3	2343	0	2399	0.333472	16.6667	14.2857
eRF1_3	eRF1 domain 3	91	396.835	2.923	2.923	1	355	3	3	135	0	227	0.440529	1.0989	1.08696
DnaJ_CXXCXGXG	DnaJ central domain (4 repeats)	176	416.347	2.932	2.915	2	380.5	3	3	2218	0	2396	0.0834725	1.13636	1.1236
Topoisom_bac	DNA topoisomerase	83	810	2.94	2.627	1	854	3	2	2914	0	2998	0.0333556	1.20482	1.19048
ABC_membrane	ABC transporter transmembrane region	1235	1027.33	2.999	1.899	1	705	3	3	12808	0	14044	0.00712048	0.0809717	0.0809061
IMS_HHH	IMS family HHH motif	27	711.667	3.074	3.074	1	416	3	3	1409	0	1437	0.0695894	3.7037	3.57143
U-box	U-box domain	214	633.953	3.103	2.019	1	1297	3	3	133	0	348	0.287356	0.46729	0.465116
PH	PH domain	3051	844.701	3.103	2.491	1	501	3	3	720	0	3772	0.0265111	0.0327761	0.0327654
MutS_V	MutS domain V	233	690.124	3.129	3.064	1	1124	3	3	2869	0	3103	0.0322269	0.429185	0.42735
Pkinase_C	Protein kinase C terminal domain	855	753.54	3.338	2.861	1	501	3	3	314	0	1170	0.0854701	0.116959	0.116822
RQC	RQC domain	67	1018.3	3.776	3.776	1	548	3	3	1007	0	1075	0.0930233	1.49254	1.47059
AIRS	AIR synthase related protein, N-terminal domain	164	796.061	3.854	3.488	2	553	3	2	4656	0	4822	0.0414766	1.21951	1.20482
Cbl_N	CBL proto-oncogene N-terminal domain 1	68	685.368	3.985	3.971	1	390	3	3	0	0	69	1.44928	1.47059	1.44928
MutS_III	MutS domain III	163	898.018	4.086	3.994	1	1124	3	3	1754	0	1918	0.0521376	0.613497	0.609756
Cbl_N2	CBL proto-oncogene N-terminus, EF hand-like domain	66	678.106	4.121	4.106	1	390	3	3	0	0	67	1.49254	1.51515	1.49254
Cbl_N3	CBL proto-oncogene N-terminus, SH2-like domain	61	721.639	4.295	4.279	1	390	3	3	0	0	62	1.6129	1.63934	1.6129
Response_reg	Response regulator receiver domain	59	595.746	2.441	2.441	13	635.154	3.077	3.077	54164	0	54236	0.0239693	22.0339	18.0556
Collagen	Collagen triple helix repeat (20 copies)	2097	583.92	4.547	1.762	106	522.283	3.113	1.604	1213	1	3416	3.10304	5.05484	4.81162
Myc-LZ	Myc leucine zipper domain	705	200.332	3.003	2.996	15	431.467	3.133	3.067	0	6	720	2.08333	2.12766	2.08333
Sushi	Sushi domain (SCR repeat)	1507	746.745	6.064	2.358	128	301.945	3.266	1	0	4	1635	7.82875	8.4937	7.82875
OTU	OTU-like cysteine protease	295	619.573	1.546	1.278	92	2569.46	3.293	3.293	156	3	543	16.9429	31.1864	23.7726
Glyco_hydro_2_N	Glycosyl hydrolases family 2, sugar binding domain	94	674.011	2.287	2.287	2	814	3.5	3.5	2038	0	2134	0.0937207	2.12766	2.08333
Glyco_hydro_2_C	Glycosyl hydrolases family 2, TIM barrel domain	90	600.789	2.344	2.344	2	814	3.5	3.5	1715	0	1807	0.110681	2.22222	2.17391
Glyco_hydro_2	domain	56	674.696	2.893	2.893	2	814	3.5	3.5	1803	0	1861	0.107469	3.57143	3.44828
Kelch_1	Kelch motif	1441	571.206	4.693	2.409	212	358.764	3.528	2.071	507	3	2160	9.81481	14.712	12.8252
Ribosomal_S27	Ribosomal protein S27a	117	145.385	1.821	1.812	14	610.643	3.571	3.571	61	0	192	7.29167	11.9658	10.687
Gag_MA	Matrix protein (MA), p15	27	734.296	3.667	3.481	133	710.481	3.609	3.609	0	4	160	83.125	492.593	83.125
Gag_p30	Gag P30 core shell protein	26	784.269	3.731	3.538	122	759.311	3.779	3.779	0	3	148	82.4324	469.231	82.4324
zf-CCHC	Zinc knuckle	546	470.438	3.161	1.839	11652	347.45	3.865	3.08	419	2	12617	92.3516	2134.07	95.5239
BACK	BTB And C-terminal Kelch	1622	536.113	4.059	2.473	161	407.366	3.882	2.416	0	3	1783	9.02973	9.92602	9.02973
2OG-FeII_Oxy	2OG-Fe(II) oxygenase superfamily	674	468.153	1.55	1.528	64	1532.08	3.891	3.875	1919	0	2657	2.40873	9.49555	8.67209
BTB	BTB/POZ domain	3375	573.052	2.891	1.952	162	444.333	3.957	2.432	561	3	4098	3.95315	4.8	4.58015
PAS_3	PAS fold	993	674.481	2.175	2.162	2	587	4	4	5198	0	6193	0.0322945	0.20141	0.201005
Myb_DNA-binding	Myb-like DNA-binding domain	523	657.532	2.281	1.774	1	382	4	3	621	1	1145	0.0873362	0.191205	0.19084
E1-E2_ATPase	E1-E2 ATPase	1160	897.234	2.866	2.675	2	870.5	4	4	7725	0	8887	0.0225048	0.172414	0.172117
Cation_ATPase_C	Cation transporting ATPase, C-terminus	583	912.861	3.581	3.552	2	870.5	4	4	1968	0	2553	0.0783392	0.343053	0.34188
F_actin_bind	F-actin binding	28	1083.04	3.714	3.679	2	863.5	4	4	0	0	30	6.66667	7.14286	6.66667
Cation_ATPase_N	Cation transporter/ATPase, N-terminus	529	944.9	3.836	3.807	2	870.5	4	4	2370	0	2901	0.0689417	0.378072	0.376648
CDC48_2	Cell division protein 48 (CDC48), domain 2	114	710.053	4.053	3.158	1	690	4	3	129	0	244	0.409836	0.877193	0.869565
CDC48_N	Cell division protein 48 (CDC48), N-terminal domain	107	723.131	4.14	3.224	1	690	4	3	165	0	273	0.3663	0.934579	0.925926
BNR	BNR/Asp-box repeat	72	910.986	5.389	1.403	11	511.273	4	1.364	1557	0	1640	0.670732	15.2778	13.253
Retro_M	Retroviral M domain	107	309.617	1.393	1.346	50	629.62	4.04	3.48	0	9	157	31.8471	46.729	31.8471
AIG1	AIG1 family	172	319.843	1.145	1.012	73	1507.3	4.151	4.068	82	0	327	22.3242	42.4419	29.7959
HisKA	His Kinase A (phosphoacceptor) domain	7	433.429	2.429	2.429	6	785.333	4.167	4.167	30623	0	30636	0.0195848	85.7143	46.1538
Laminin_EGF	Laminin EGF-like (Domains III and V)	774	1269.03	8.845	2.924	8	947	4.25	1	1	1	783	1.02171	1.03359	1.02302
Gag_p12	Gag polyprotein, inner coat protein p12	14	688.857	3.929	3.929	77	777.909	4.364	4.364	0	0	91	84.6154	550	84.6154
DUF1388	Repeat of unknown function (DUF1388)	8	844.625	9.125	1.625	27	229.963	4.593	1	18	0	53	50.9434	337.5	77.1429
Gag_p10	Retroviral GAG p10 protein	38	556.158	3.421	2.711	39	780.769	4.641	4.256	0	1	77	50.6494	102.632	50.6494
GAF	GAF domain	162	816.833	2.667	1.901	2	924	5	5	6146	0	6310	0.0316957	1.23457	1.21951
PI3Ka	Phosphoinositide 3-kinase family, accessory domain (PIK domain)	216	1258.42	4.051	3.968	1	1083	5	5	127	0	344	0.290698	0.462963	0.460829
PI3K_C2	Phosphoinositide 3-kinase C2	173	1152.36	4.59	4.486	1	1083	5	5	61	0	235	0.425532	0.578035	0.574713
PI3K_p85B	PI3-kinase family, p85-binding domain	74	964.797	4.649	4.608	1	1083	5	5	0	0	75	1.33333	1.35135	1.33333
PI3K_rbd	PI3-kinase family, ras-binding domain	134	1191.5	4.918	4.799	1	1083	5	5	0	0	135	0.740741	0.746269	0.740741
Sel1	Sel1 repeat	176	581.057	5.017	1.25	3	552.333	5.667	1	3051	0	3230	0.0928793	1.70455	1.67598
NC	NC domain	115	206.27	1.017	1.017	3	2134	6	5	114	3	232	1.2931	2.6087	2.54237
Kelch_2	Kelch motif	220	735.382	3.368	2.173	3	547.667	6	4	135	0	358	0.837989	1.36364	1.34529
NODP	NOTCH protein	89	1953.78	25.079	6.382	4	506.75	6	2	0	0	93	4.30108	4.49438	4.30108
RnaseH	RNase H	152	591.632	3.059	3.007	4314	840.78	6.532	6.49	2114	4	6580	65.5623	2838.16	96.5965
C_tripleX	Cysteine rich repeat	68	674.074	14.265	1	1	125	7	1	0	0	69	1.44928	1.47059	1.44928
Macro	Macro domain	212	520.722	1.561	1.358	601	3476.72	7.546	7.414	824	37	1637	36.7135	283.491	73.9237
FtsJ	FtsJ-like methyltransferase	204	507.686	1.52	1.515	2146	3224.88	13.972	13.972	1941	30	4291	50.0117	1051.96	91.3191
